# Supplementary material for: The hydrological regime of a forested tropical Andean catchment
Source: Copernicus journal article supplement (doi:10.5194/hess-18-5377-2014), 2014-12-21
Supplement: Supplementary file 1 [file hess-18-5377-2014-supplement.pdf]

Supplement of Hydrol. Earth Syst. Sci., 18, 5377–5397, 2014  
<http://www.hydrol-earth-syst-sci.net/18/5377/2014/>  
doi:10.5194/hess-18-5377-2014-supplement  
© Author(s) 2014. CC Attribution 3.0 License.

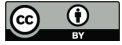

*Supplement of*

## **The hydrological regime of a forested tropical Andean catchment**

**K. E. Clark et al.**

*Correspondence to:* K. E. Clark (kathryn.clark23@gmail.com)

## 1 **S1. Materials and methods**

### 2 **S1.1. Catchment wide rainfall estimates**

3 The calibration of the TRMM 3B43 v.7a data and calculation of catchment wide  
4 rainfall for the Kosñipata catchment used the following series of steps: (1) For individual  
5 meteorological stations, monthly rainfall ( $\text{mm month}^{-1}$ ) was compared to the TRMM data  
6 ( $\text{mm month}^{-1}$ ) and a linear regression was determined (Table S8). (2) These regression  
7 equations were used to estimate a calibrated monthly rainfall ( $\text{mm month}^{-1}$ ) for the 9  
8 meteorological stations for each TRMM month from 1998 to 2012 ( $n = 180$ ). The mean  
9 annual estimated rainfall ( $\text{mm yr}^{-1}$ ), from adding these monthly values over each year, ranged  
10 from 1600 to 5260  $\text{mm yr}^{-1}$  for the various meteorological stations (Table S2). The mean  
11 monthly estimated rainfall for the study period calculated by this method coincided well with  
12 the measured meteorological station rainfall (Fig. 2a). (3) For each TRMM month ( $n = 180$ )  
13 another linear regression was determined between the elevation of each meteorological  
14 station and the estimated rainfall for the respective station (from step 2). (4) The elevation  
15 distribution and its proportion within each river catchment at 1 masl intervals were  
16 determined in ArcGIS at a  $90 \text{ m} \times 90 \text{ m}$  pixel resolution using Shuttle Radar Topography  
17 Mission (SRTM) digital elevation model (DEM), using the catchment boundaries in Figure  
18 1a. (5) For each month, the linear regression equation developed in step 3 was applied to the  
19 elevation distributions in order to estimate rainfall by month ( $\text{mm month}^{-1}$ ), yielding  
20 catchment-averaged monthly rainfall estimates over the duration of the TRMM record (Fig.  
21 4). (6) Rainfall was corrected for wind-induced rainfall losses following the method outlined  
22 in the main text and summarised in Table S3. (7) For our study period, the monthly data were  
23 summed to yield seasonal and annual estimated rainfall. The estimated catchment wide  
24 monthly rainfall data from the TRMM study period (1998 to 2012) was summed to yield  
25 annual results ( $\text{mm yr}^{-1}$ ; Table S5). Our rainfall results generally agree with rainfall estimated  
26 throughout the Andes using a correction of a TRMM 3B42 v.7 3-hourly rain rate data set  
27 with meteorological station rainfall data (Lowman and Barros, 2014).

### 28 **S1.2. Discharge and runoff measures**

#### 29 **S1.2.1. Kosñipata River at the San Pedro gauging station**

30 In the Kosñipata River at the San Pedro gauging station ( $13^{\circ}3'37''\text{S}$ ,  $71^{\circ}32'40''\text{W}$ ;  
31 1360 masl), river velocity was measured using handheld velocity meters and, during portions  
32 of the year when it was too dangerous to enter the river, using a float method with 5  
33 replicates (Baud et al., 2005; McMahon, 1957). Metered stream velocity was measured with a  
34 Flow Probe (Global Water FP101); this probe records average and maximum stream velocity  
35 across the full cross-section of the river. We corrected all float-measured velocities based on  
36 the regression of mean velocity and max velocity measurements. As a check on our  
37 measurements, we compared our corrected maximum velocity with a theoretical  
38 hydrodynamic velocity, adopting the Jarrett (1984) modification of Manning's Equation for  
39 mountain rivers. The slope ( $S$ ) of the Kosñipata channel at San Pedro is 0.04, determined  
40 independently by two methods: 1) from Quickbird orthorectified imagery and GPS waypoints

41 of two different points along the river, and 2) from a LiDAR-based digital elevation model  
 42 from the Carnegie Airborne Observatory (CAO) (Asner, 2014). The hydraulic radius was  
 43 measured in the field, over the dry season and ranged from  $R = 0.40$  m to  $0.49$  m ( $n = 8$ ). The  
 44 difference between the empirical velocity measurements and those determined from theory  
 45 using these  $S$  and  $R$  values ranged from  $-9.7\%$  to  $13.1\%$ , with a mean difference of  $0.65\%$  ( $n$   
 46  $= 7$ ). Given the range of assumptions in both the theoretical and empirical values, we view  
 47 this similarity as encouraging validation of our methods.

48 Discharge was calculated by multiplying corrected velocity times the river cross-  
 49 sectional area, determined by measuring in-stream river profiles and out-of-stream bank area  
 50 at low flow several times over the span of the study. Discharge and river stage height were  
 51 used to construct a power-law stage-discharge rating curve for the Kosñipata River at the San  
 52 Pedro gauging station ( $n = 13$ ;  $r^2 = 0.93$ ,  $P = < 0.0001$ ):

$$Discharge \left( \frac{m^3}{s} \right) = 34.9952 \pm 2.3189 \times Stage \text{ ht } (m)^{1.0448 \pm 0.1146} \quad (S1)$$

53 The Kosñipata River measured at the San Pedro gauging station had an almost  
 54 continuous river height record for the study year, from a pressure transducer (Global Water  
 55 W16 level logger) recording river height every 15 minutes. The instantaneous discharge  
 56 associated with each height measurement was calculated using Eq (S1). During the gap in  
 57 logger between mid-July and early-August, three manual river height measures were taken  
 58 and linear interpolation was conducted on daily mean discharge to fill-in the gap. Monthly  
 59 instantaneous discharge ( $m^3 s^{-1}$ ) was determined from the total monthly flow, and seasonal  
 60 discharges ( $m^3 s^{-1}$ ) and annual discharge ( $m^3 s^{-1}$ ) were determined from the monthly  
 61 instantaneous discharges by summing over the appropriate time periods.

62 Baseflow was determined for the Kosñipata River at the San Pedro gauging station  
 63 using the method outlined in Gustard et al. (1992): (1) The 5-day minimum mean daily  
 64 discharge was determined for non-overlapping 5 day blocks over the study period. (2) The 5-  
 65 day minima were multiplied by 0.9, and if this value was less than either the preceding or  
 66 subsequent 5-day minimum, it was assigned to be part of the baseflow. (3) Mean daily  
 67 discharge values were linearly interpolated in between the selected 5-day minimum discharge  
 68 values selected in step two. (4) If the linearly interpolated daily baseflow discharge value was  
 69 less than the actual mean daily discharge value, the actual value was replaced by the  
 70 interpolated value for that day. Base flow index (BFI) was calculated as the ratio of the total  
 71 volume of baseflow divided by the total volume of streamflow.

### 72 **S1.2.2. Kosñipata River at the Wayqecha gauging station**

73 Stream velocities at Wayqecha gauging station ( $13^{\circ}9'46''S$ ,  $71^{\circ}35'21''W$ ; 2250 masl)  
 74 were measured using an MJP Student Stream Flow Meter as close as possible to the middle  
 75 of the channel, at 75% of the total vertical depth down from the water surface, or by float  
 76 method when necessary. The shallow depth and broad width of the Kosñipata at Wayqecha  
 77 meant that these methods yielded indistinguishable results, and float velocities were not  
 78 corrected at this site.

79 At the Wayqecha station, field discharge measurements were taken weekly to monthly  
80 over the one year study period ( $n = 44$ ), plus a two week intensive wet season study period  
81 from the end of January to mid-February 2010 ( $n = 15$ ; Fig. 3). Four river profiles were used  
82 over the course of the study year because of the changing channel morphology, with unique  
83 power-law stage-discharge rating curves (cf. Eq. S1) used for each of the 4 river profiles.  
84 Instantaneous discharge ( $\text{m}^3 \text{s}^{-1}$ ) measurements were used to determine mean monthly  
85 discharge. The annual discharge was calculated as the mean of the monthly discharge rates  
86 (there were no measurements in September, so the monthly value was extrapolated linearly  
87 based on August and October). There are significant uncertainties associated with the  
88 discharge and runoff of the Kosñipata River measured at the Wayqecha gauging station, since  
89 the data comes from only 59 spot measurements throughout the year. Given the large  
90 uncertainties, the discharge data from Wayqecha is not used in the analysis in the main text  
91 but is provided at the end of this Supplement for reference.

### 92 **S1.3. Actual evapotranspiration estimates**

93 Evapotranspiration (ET) was calculated as the sum of soil evaporation ( $LE_s$ ), canopy  
94 transpiration ( $LE_c$ ), and evaporation of canopy intercepted water ( $LE_i$ ) using the Priestley and  
95 Taylor - Jet Propulsion Laboratory (PT- JPL) model (Fisher et al., 2008). The five most  
96 important parameters for calculating ET via this method are: net radiation ( $R_n$ ), normalised  
97 difference vegetation index (NDVI), soil adjusted vegetation index (SAVI), maximum air  
98 temperature ( $T_{\text{max}}$ ), and water vapour pressure ( $ea$ ). NDVI was converted to leaf area index  
99 (LAI) and then used to predict SAVI, and minimum relative humidity ( $RH_{\text{min}}$ ) and  $T_{\text{max}}$  were  
100 used to predict water vapour pressure. The PT-JPL model (Fisher et al., 2008) was applied to  
101 all meteorological stations using station-measured  $RH_{\text{min}}$ ,  $T_{\text{max}}$ , and solar radiation ( $R_s$ ) or  
102 photosynthetically active radiation (PAR) data.

103  $R_n$  was estimated from  $R_s$  or PAR data (Table S2). For stations without direct  $R_s$  data,  
104 PAR was divided by 2.1 to estimate solar radiation ( $R_s$ ) which is largely a conversion from  
105  $\mu\text{mol}$  to PAR ( $\text{m}^{-2} \text{s}^{-1}$ ) to total radiation  $R_s$  ( $\text{W m}^{-2}$ ) (Monteith and Unsworth, 2013).  $R_n$  was  
106 estimated from  $R_s$  by multiplying by either 0.5 for meteorological stations in the scrubland  
107 and puna grasslands  $> 3450$  masl (Gilmanov et al., 2007), 0.7 for stations encompassing  
108 UMCF from 2000 to 3450 masl (Holwerda, 2005) or 0.75, a typical fraction for tropical  
109 forests (Fisher et al., 2010; Malhi et al., 2002), for stations in LMCF/LMRF ranging from  
110 1350 to 2000 masl. The elevational ranges for each ecosystem type were determined from an  
111 ecosystem distribution map of Peru (Consbio, 2011). The vegetation type characteristic of  
112 each meteorological station is shown in Table S2. There are 2, 3, and 2 meteorological  
113 stations located in the transition/puna grasslands, UMCF, and LMCF/LMRF respectively  
114 (Table S2). Seasonal means for each meteorological station of  $RH_{\text{min}}$ ,  $T_{\text{max}}$ , and  $R_n$  were  
115 determined and the PT-JPL model was run for each station (Table S2). An NDVI of 0.85,  
116 which the PT-JPL model converted to a LAI of 5.4, was determined for the forests (transition,  
117 UMCF, LMCF, and LMRF ecosystem types) using an elevation-based linear regression  
118 (Asner et al., 2014). NDVI across the forested catchment was determined from data collected  
119 by the Carnegie Airborne Observatory (CAO) AToMS, which includes a visible-to-  
120 shortwave Infrared (VSWIR) imaging spectrometer (Asner et al., 2012) with collection

121 including near infrared (NIR at 800 nm) and visible (VIS at 680 nm) wavelengths that was  
122 used to generate high resolution NDVI data along the altitudinal gradient in the Kosñipata  
123 catchment (Asner et al., 2014). An NDVI of 0.31, which the PT-JPL model converted to a  
124 LAI of 1.0, was utilised for the puna grasslands, based on a multi-year mean of atmospheric  
125 corrected Landsat images for puna grasslands in the Kosñipata valley (Zelazowski et al.,  
126 2011).

127 The proportion of each elevation within the catchment was determined following  
128 Figure 2c in the main text; transition/puna grasslands, UMCF, and LMCF/LMRF covered  
129 10.1, 80.6, and 8.3 % of the catchment respectively. For each ecosystem type  
130 (puna/transition, UMCF, and LMCF/LMRF), AET was determined from the meteorological  
131 station AET results (Table S2). The seasonal and annual AET were determined by summing  
132 the contribution of each ecosystem type for a basin wide total.

133

#### 134 **S1.4. Water isotope measurements**

135 Rainfall samples collected in 2010 and 2011 were collected in a rinsed plastic  
136 container left out in an open area near the San Pedro River gauging station and Wayqecha  
137 River gauging station during river water sample collection. Additional rainfall samples were  
138 taken February 2011 from elevations of 2050, 2130, 2300 and 2400 masl. Samples were  
139 transferred into 15 mL glass exetainers with rubber septa after filtration and stored  
140 refrigerated and unpreserved. Rain water samples from 2009 (Horwath, 2011) consisted of  
141 fresh precipitation as well as rainwater pools on leaves and were collected at elevations of  
142 1500, 2000, 2500, 3000, and 3600 masl over the course of ~1 week in April 2009, in July  
143 2009, and in September 2009 (Table S4a).

144 Cloud water vapour samples are from Horwath (2011) and were collected below the  
145 tree canopy using a ‘double action hand pump’ (Galert) to draw ambient air into a cryogenic  
146 trap (liquid N<sub>2</sub>) continuously over the course of 15-20 minutes. Cloud vapour samples were  
147 collected at the same elevations and during the same time periods as the rainwater with the  
148 exception that there were no cloud water vapour samples collected during April 2009.

149 River water samples were collected from the river surface with a clean polypropylene  
150 graduated cylinder, filtered onsite with a 0.2 µm nylon filter, and stored unpreserved in a 60  
151 mL HDPE bottles. To test the suitability of storing the samples in HDPE bottles, a subset of  
152 the samples were also collected into 15 mL glass exetainers with rubber septa after filtration  
153 and stored unpreserved. Upon returning the laboratory, all of the samples were stored at 3°C  
154 until analysis. Comparisons between the two different collection methods (i.e. HDPE bottles  
155 vs. glass exetainers) did not reveal any systematic differences and agreed within the  
156 analytical uncertainties.

157 Isotopic analyses of water samples were performed with a Picarro L1102-i cavity ring  
158 down spectrometer (CRDS) at the University of Southern California or at the University of  
159 Cambridge. Values are reported in delta notation relative to the VSMOW standard where:

160 
$$\delta D = \left( \left( \frac{D/H_{sample}}{D/H_{VSMOW}} \right) - 1 \right) * 1000 \quad (S3)$$

161 and

162 
$$\delta^{18}O = \left( \left( \frac{{}^{18}O/{}^{16}O_{sample}}{{}^{18}O/{}^{16}O_{VSMOW}} \right) - 1 \right) * 1000 \quad (S4)$$

163 Both the average value and the standard deviation of the replicate injections are reported in  
 164 Tables S4, S6 & S9. Isotopic analyses of river water samples collected in glass exetainers  
 165 were performed with either a Los-Gatos DLT-100 Liquid Water Isotope Analyzer at the  
 166 California Institute of Technology or a Delta V Advantage IRMS equipped with a Gasbench  
 167 II system at the University of Oxford. These analyses were used to check the accuracy of the  
 168 Picarro CRDS results.

169

### 170 **S1.5. Water isotope mixing model**

171 Only the samples collected in the Kosñipata River at the San Pedro gauging samples  
 172 were used in the mixing calculations, because there is a noticeable isotopic offset between the  
 173 samples from the San Pedro gauging station and the Wayqecha gauging station (Tables S6 &  
 174 S7). The isotopic offset is most likely the result of the different sampling elevations, but it is  
 175 not possible to separate quantitatively the effect of elevation on the isotopic composition of  
 176 rainfall with our data. Using the isotopic composition of small streams draining only a narrow  
 177 range of elevations with our study site, Ponton et al. (2014) calculated isotopic lapse rates for  
 178  $\delta D$  of  $-17 \pm 3 \text{ ‰ km}^{-1}$  and  $-22 \pm 2 \text{ ‰ km}^{-1}$  for dry and wet season conditions respectively.  
 179 Using the difference in the median elevation between the two catchments, these lapse rates  
 180 predict a  $\delta D$  offset of  $8.5 \pm 1.5 \text{ ‰}$  or  $11 \pm 1 \text{ ‰}$  for dry or wet season conditions respectively.  
 181 Broadly, these predicted offsets are consistent with our data. However, because the timescale  
 182 over which the small streams integrate the isotopic composition of precipitation is unknown  
 183 (i.e. the mean and distribution of transit times), it is not possible to robustly use these lapse  
 184 rates to extend our mixing calculations to the Wayqecha catchment.

185 We used an isotope mixing model on Kosñipata River samples from the San Pedro  
 186 gauging station to distinguish contributions to river runoff from wet season rainfall, dry  
 187 season rainfall, and cloud water. In order to use the water isotope data to make quantitative  
 188 estimates of the water sources to river flow, three end-member isotopic mixing was simulated  
 189 with the mixing equations:

$$\delta D_{river} = f_1 (\delta D_1) + f_2 (\delta D_2) + f_3 (\delta D_3) \quad (S5)$$

$$DxS_{river} = f_1 (DxS_1) + f_2 (DxS_2) + f_3 (DxS_3) \quad (S6)$$

190 and

$$1 = f_1 + f_2 + f_3 \quad (S7)$$

191 where

$$Dx_{S_{river}} = \delta D_{river} - (\delta^{18}O_{river} \times 8) \quad (S8)$$

192

193 To calculate the mixing proportions (i.e.  $f_1$ ,  $f_2$ , and  $f_3$ ), the matrix inversion function of  
194 MATLAB 2013a was used. Due to the observed variability in the three end-members (Fig. 5  
195 in main text), which is known to significantly influence the results of end-member mixing  
196 calculations (Phillips and Gregg, 2001), 10,000 random end-member  $\delta D$  and  $Dx_s$  values were  
197 generated using the observed ranges for each end-member. For each sample, the mixing  
198 proportions were determined for all of the 10,000 end member combinations, but only a  
199 fraction of the combinations (18-72%) yielded plausible results (i.e. mixing proportions  
200 between 0 and 1). The mean, 5<sup>th</sup> percentile, 50<sup>th</sup> percentile, and 95<sup>th</sup> percentile of all possible  
201 ( $0 \leq \Sigma f \leq 1$ ) mixing proportions are presented in Table S7. The effect of the analytical  
202 uncertainty on the individual rainwater samples on the calculated mixing proportions was  
203 considered by generating 1000 pseudo-random synthetic data for each sample and  
204 determining the mixing portions for each of the 10,000 end member combinations (i.e.  $10^7$   
205 simulations per sample). For each sample, the pseudo-random values were generated from a  
206 normal distribution with the measured sample mean and standard deviation. To assess  
207 whether or not  $10^7$  simulations per sample yielded re-producible results given the large  
208 number of possible end-member and sample composition combinations, replicate model  
209 calculations using different randomly generated datasets for the same input parameters were  
210 performed. These replicate calculations yielded between 0.1 and 5% variation in the  
211 statistical parameters (i.e. mean, median, and 5<sup>th</sup> and 95<sup>th</sup> percentiles) of the distribution of  
212 fractional contributions for each end-member.

213 End-member compositions were defined based on observed precipitation data for  
214 selected time intervals. The wet season rainfall end-member was determined based on the  
215 average and standard deviation of the December 2010, March 2010, January 2011, February  
216 2011, and March 2011 rainwater data (Fig. 5). For dry season precipitation, the average and  
217 standard deviation of the September 2009, July 2009, June 2010, and June 2011 rainwater  
218 data was used. The cloud water vapour was defined by the average and standard deviation of  
219 the July and September 2009 cloud water data, which was the only available data (Table  
220 S4b).

## 221 **S2. Results**

### 222 **S2.1. Isotopic analyses**

223 Rainwater  $\delta D$  and  $\delta^{18}O$  values display considerable seasonal variation whereas  
224 variation with elevation during a given season is less pronounced (Table S4a; Fig. S1).  
225 Rainwater  $\delta D$  and  $\delta^{18}O$  values are enriched during the dry season. Kosñipata rainwaters  
226 defined the local meteoric water line (LMWL, the relationship between  $\delta D$  and  $\delta^{18}O$  in  
227 precipitation; Fig. S1) defined by  $\delta D = 8.6561 \times \delta^{18}O + 21.119$ , close to the global meteoric  
228 water line (GMWL) of  $\delta D = 8.20 \times \delta^{18}O + 11.27$  (Rozanski et al., 1993; Craig, 1961). In

229 southern Ecuador the LMWL was found to be even closer to the GMWL (Windhorst et al.,  
230 2013). Dxs, which is the deviation from the GMWL, shows minimal seasonal variation in the  
231 Kosñipata rainfall samples (Fig. 5).

232 The Kosñipata cloud water vapour has similar dD and  $\delta^{18}\text{O}$  to rainwater (Fig. S1)  
233 probably because of the orographic mechanism of cloud formation at this site (Scholl et al.,  
234 2011). Kosñipata cloud water has slightly depleted  $\delta^{18}\text{O}$  and slightly enriched  $\delta\text{D}$  (i.e. higher  
235 Dxs, by  $> +20\text{‰}$ ) compared to the LMWL. The deviation of cloud water from the LMWL is  
236 probably due to local water recycling (Horwath, 2011; Froehlich et al., 2002). The higher and  
237 more variable Dxs of the cloud water vapour samples separates this cloud source from the  
238 rainfall samples and is the main isotopic characteristic that allows them to be differentiated in  
239 the mixing model (Fig. S1; Table S4b). Dxs has been used as a tool to evaluate water  
240 recycling in other tropical montane cloud forests (Scholl et al., 2007; Rhodes et al., 2006) and  
241 tropical forests such as the Amazon (Martinelli et al., 1996; Salati et al., 1979), to evaluate  
242 the sources of fog (Liu et al., 2007), and to evaluate the contribution of seasonal precipitation  
243 to streamflow (Guswa et al., 2007), but as far as we are aware, this is its first use as a  
244 fingerprint of cloud inputs to streamflow.

245 Streamwater samples fall along the LMWL, suggesting that evaporation most likely is  
246 not a major determinant of stream water isotopic composition (Fig. S1). This is consistent  
247 with similar Cl concentrations in rainwater (2 – 20  $\mu\text{M}$ ) and streamflow (2 – 12  $\mu\text{M}$ ) (Torres  
248 et al., in review). Stream water isotopes in the Kosñipata River are consistent with other  
249 samples measured from the Amazon and Andes (Lambs et al., 2012; Lambs et al., 2007), i.e.  
250 they are similar to values previously measured from high Andean sites that are relatively  
251 depleted compared to the lowland Amazon due to Rayleigh distillation during orographic  
252 rain-out (Gat, 1996).

253

## 254 **S2.2. Results from the Wayqecha gauging station**

### 255 **S2.2.1. Catchment wide rainfall**

256 The Kosñipata sub-basin of Wayqecha had a lower catchment wide rainfall than the  
257 larger catchment at San Pedro (Table S5). This was apparent in the distribution of rainfall  
258 throughout the catchment (Fig. 2d) and reflects variation in annual rainfall as a function of  
259 elevation (Table S2). Seasonal differences suggest that the wet season is slightly more  
260 dominant in the Wayqecha sub-basin (+4% compared to the same period in the larger basin  
261 measured at the San Pedro gauging station) and that the dry season rainfall is slightly more  
262 dominant in the larger basin measured at the San Pedro gauging station (+3% compared to  
263 the same period in the Wayqecha sub-basin; Tables 2 & S10).

### 264 **S2.2.2. Discharge and runoff**

265 The Wayqecha sub-basin in the Kosñipata catchment, with a mean elevation 3195  
266 masl and an area of 48.5  $\text{km}^2$ , was estimated to have a mean annual discharge of 4.7  $\text{m}^3 \text{s}^{-1}$   
267 with an annual runoff of 3065  $\text{mm yr}^{-1}$  (8.4  $\text{mm d}^{-1}$ ; Table S10). The catchment had a



268 seasonal range in monthly mean values of 2.3 to 8.8 m<sup>3</sup> s<sup>-1</sup> (4.1 to 14.1 mm d<sup>-1</sup>). There are  
269 significant uncertainties in these annual totals for the Wayqecha station as they are based on  
270 only 59 spot measurements of discharge. The seasonal variation in flow was greater in  
271 amplitude at the Wayqecha gauge (Table S10) than compared to that of the San Pedro river  
272 gauge (Table 2). This suggests that the discharge and runoff in the sub-basin of Wayqecha  
273 follows a similar pattern to the larger Kosñipata catchment measured at San Pedro, but may  
274 be subjected to more short-term variation.

275

### 276 **S2.2.3. Water isotopes at Wayqecha station**

277 At the Kosñipata River gauging station at Wayqecha,  $\delta D$  and  $\delta^{18}O$  values were more  
278 depleted than at the Kosñipata River gauging station at San Pedro as a result of altitude  
279 effects on water isotope ratios (cf. Lambs et al. (2012)). At the Wayqecha gauging station,  
280 values for  $\delta D$ ,  $\delta^{18}O$ , and  $D_{xs}$  ranged from  $-107.0$  to  $-88.9$  ‰,  $-15.9$  to  $-13.5$  ‰, and  $18.3$  to  
281  $20.5$  ‰ (Table S9). Relative to samples collected in the Kosñipata River at the San Pedro  
282 gauging station, seasonality in the Kosñipata River at the Wayqecha gauging station was less  
283 pronounced.

### 284 **S2.2.4. Water budget for Wayqecha**

285 The inputs for the headwater basin (Wayqecha) are estimated at 2750 mm yr<sup>-1</sup> (wind-  
286 loss corrected rainfall at 2519 mm yr<sup>-1</sup> and assuming CWI at 232 mm yr<sup>-1</sup> based on estimated  
287 CWI for the San Pedro gauging station). The outputs are 3709 mm yr<sup>-1</sup>, with runoff at 3065  
288 mm yr<sup>-1</sup> and AET at 643 mm yr<sup>-1</sup> (Table S10). Thus, outputs exceeded inputs by 960 mm yr<sup>-1</sup>  
289 (35%), in part due to the very large uncertainties particularly on estimated discharge for this  
290 sub-catchment.

291

292 **References for supplementary information**

293

294 ACCA: Weather data San Pedro station, Asociación para la conservación de la cuenca Amazónica  
295 <http://atrium.andesamazon.org/index.php>, (last access: April 2012), 2012.

296 Asner, G. P., Knapp, D. E., Boardman, J., Green, R. O., Kennedy-Bowdoin, T., Eastwood, M., Martin, R.  
297 E., Anderson, C., and Field, C. B.: Carnegie Airborne Observatory-2: Increasing science data  
298 dimensionality via high-fidelity multi-sensor fusion, *Remote Sens. Environ.*, 124, 454-465,  
299 <http://dx.doi.org/10.1016/j.rse.2012.06.012>, 2012.

300 Asner, G. P.: unpublished data, 2014.

301 Asner, G. P., Anderson, C. B., Martin, R. E., Knapp, D. E., Tupayachi, R., Sinca, F., and Malhi, Y.:  
302 Landscape-scale changes in forest structure and functional traits along an Andes-to-Amazon  
303 elevation gradient, *Biogeosciences*, 11, 843-856, <http://dx.doi.org/10.5194/bg-11-843-2014>,  
304 2014.

305 Baud, O., Hager, W. H., and Minor, H. E.: Toward nonintrusive flood discharge measurement, *J.*  
306 *Hydraul. Eng.*, 131, 1031-1035, [http://dx.doi.org/10.1061/\(ASCE\)0733-  
307 9429\(2005\)131:12\(1031\)](http://dx.doi.org/10.1061/(ASCE)0733-9429(2005)131:12(1031)), 2005.

308 Consbio: Ecosistemas Terrestres de Peru (Data Basin Dataset) for ArcGIS, The Nature  
309 Conservancy/NatureServe Covallis, Oregon, USA, (last access: April 2012), 2011.

310 Craig, H.: Standard for Reporting Concentrations of Deuterium and Oxygen-18 in Natural Waters,  
311 *Science*, 133, 1833-1834, <http://dx.doi.org/10.1126/science.133.3467.1833>, 1961.

312 Fisher, J. B., Tu, K. P., and Baldocchi, D. D.: Global estimates of the land-atmosphere water flux  
313 based on monthly AVHRR and ISLSCP-II data, validated at 16 FLUXNET sites, *Remote Sens.*  
314 *Environ.*, 112, 901-919, <http://dx.doi.org/10.1016/j.rse.2007.06.025>, 2008.

315 Fisher, J. B., Whittaker, R. J., and Malhi, Y.: ET come home: potential evapotranspiration in  
316 geographical ecology, *Global Ecol. Biogeogr.*, 20, 1-18, [http://dx.doi.org/10.1111/j.1466-  
317 8238.2010.00578.x](http://dx.doi.org/10.1111/j.1466-8238.2010.00578.x), 2010.

318 Froehlich, K., Gibson, J. J., and Aggarwal, P.: Deuterium excess in precipitation and its climatological  
319 significance, *Proceeding of Study of Environmental Change Using Isotope Techniques*,  
320 Vienna, Austria, 23-27 April 2001, IAEA-CSP-13/P, 54-66, 2002.

321 Gat, J. R.: Oxygen and hydrogen isotopes in the hydrologic cycle, *Annu. Rev. Earth Pl. Sc.*, 24, 225-  
322 262, 1996.

323 Gilmanov, T. G., Soussana, J. F., Aires, L., Allard, V., Ammann, C., Balzarolo, M., Barcza, Z., Bernhofer,  
324 C., Campbell, C. L., Cernusca, A., Cescatti, A., Clifton-Brown, J., Dirks, B. O. M., Dore, S.,  
325 Eugster, W., Fuhrer, J., Gimeno, C., Gruenwald, T., Haszpra, L., Hensen, A., Ibrom, A., Jacobs,  
326 A. F. G., Jones, M. B., Lanigan, G., Laurila, T., Lohila, A., G.Manca, Marcolla, B., Nagy, Z.,  
327 Pilegaard, K., Pinter, K., Pio, C., Raschi, A., Rogiers, N., Sanz, M. J., Stefani, P., Sutton, M.,  
328 Tuba, Z., Valentini, R., Williams, M. L., and Wohlfahrt, G.: Partitioning European grassland  
329 net ecosystem CO<sub>2</sub> exchange into gross primary productivity and ecosystem respiration  
330 using light response function analysis, *Agr Ecosyst Environ*, 121, 93-120,  
331 <http://dx.doi.org/10.1016/j.agee.2006.12.008>, 2007.

332 Girardin, C. A. J., Silva-Espejo, J. E., Doughty, C. E., Huaraca Huasco, W., Metcalfe, D. B., Durand-Baca,  
333 L., Marthews, T. R., Aragao, L. E. O. C., Farfan Rios, W., García Cabrera, K., Halladay, K.,  
334 Fisher, J. B., Galiano-Cabrera, D. F., Huaraca-Quispe, L. P., Alzamora-Taype, I., Equiluz-Mora,  
335 L., Salinas-Revilla, N., Silman, M., Meir, P., and Malhi, Y.: Productivity and carbon allocation  
336 in a tropical montane cloud forest of the Peruvian Andes, *Plant Ecology and Diversity*, 7, 107-  
337 123, <http://dx.doi.org/10.1080/17550874.2013.820222>, 2014.

338 Gustard, A., Bullock, A., and Dixon, J.: Low flow estimation in the United Kingdom, Low flow  
339 estimation in the United Kingdom, Institute of Hydrology, Wallingford, UKpp., 1992.

340 Guswa, A. J., Rhodes, A. L., and Newell, S. E.: Importance of orographic precipitation to the water  
341 resources of Monteverde, Costa Rica, *Adv Water Resour*, 30, 2098-2112,  
342 <http://dx.doi.org/10.1016/j.advwatres.2006.07.008>, 2007.

343 Holwerda, F.: Water and energy budgets of rain forests along an elevation gradient under maritime  
344 tropical conditions, PhD, Earth Sciences, VU University, Amsterdam, The Netherlands, 167  
345 pp., 2005.

346 Holwerda, F., Burkard, R., Eugster, W., Scatena, F., Meesters, A., and Bruijnzeel, L.: Estimating fog  
347 deposition at a Puerto Rican elfin cloud forest site: comparison of the water budget and  
348 eddy covariance methods, *Hydrol Process*, 20, 2669-2692,  
349 <http://dx.doi.org/10.1002/hyp.6065>, 2006.

350 Horwath, A.: Epiphytic bryophytes as cloud forest indicators: Stable isotopes, biomass and diversity  
351 along an altitudinal gradient in Peru, Doctor of Philosophy, Plant Sciences, University of  
352 Cambridge, Cambridge, 260 pp., 2011.

353 Huaraca Huasco, W., Girardin, C. A. J., Doughty, C. E., Metcalfe, D. B., Baca, L. D., Silva-Espejo, J. E.,  
354 Cabrera, D. G., Aragão, L. E. O., Davila, A. R., Marthews, T. R., Huaraca-Quispe, L. P.,  
355 Alzamora-Taype, I., Eguiluz-Mora, L., Farfan-Rios, W., Cabrera, K. G., Halladay, K., Salinas-  
356 Revilla, N., Silman, M., Meir, P., and Malhi, Y.: Seasonal production, allocation and cycling of  
357 carbon in two mid-elevation tropical montane forest plots in the Peruvian Andes, *Plant  
358 Ecology and Diversity*, 1-2, 125-142, <http://dx.doi.org/10.1080/17550874.2013.819042>,  
359 2014.

360 Jarrett, R. D.: Hydraulics of high-gradient streams, *J. Hydraul. Eng.*, 110, 1519-1539, 1984.

361 Lambs, L., Muller, E., and Fromard, F.: The Guianese paradox: How can the freshwater outflow from  
362 the Amazon increase the salinity of the Guianan shore?, *J. Hydrol.*, 342, 88-96,  
363 <http://dx.doi.org/10.1016/j.jhydrol.2007.05.022>, 2007.

364 Lambs, L., Horwath, A., Otto, T., Julien, F., and Antoine, P. O.: Isotopic values of the Amazon  
365 headwaters in Peru: comparison of the wet upper Río Madre de Dios watershed with the dry  
366 Urubamba-Apurimac river system, *Rapid Commun. Mass Sp.*, 26, 775-784,  
367 <http://dx.doi.org/10.1002/rcm.6157>, 2012.

368 Liu, W. J., Liu, W. Y., Li, P. J., Gao, L., Shen, Y. X., Wang, P. Y., Zhang, Y. P., and Li, H. M.: Using stable  
369 isotopes to determine sources of fog drip in a tropical seasonal rain forest of Xishuangbanna,  
370 SW China, *Agr. Forest Meteorol.*, 143, 80-91,  
371 <http://dx.doi.org/10.1016/j.agrformet.2006.11.009>, 2007.

372 Lowman, L. E. L., and Barros, A. P.: Investigating Links between Climate and Orography in the central  
373 Andes: Coupling Erosion and Precipitation using a Physical-statistical Model, *J Geophys Res-  
374 Earth*, <http://dx.doi.org/10.1002/2013JF002940>, 2014.

375 Malhi, Y., Pegoraro, E., Nobre, A. D., Pereira, M. G. P., Grace, J., Culf, A. D., and Clement, R.: Energy  
376 and water dynamics of a central Amazonian rain forest, *J. Geophys. Res.*, 107, 8061,  
377 <http://dx.doi.org/10.1029/2001JD000623>, 2002.

378 Martinelli, L. A., Victoria, R. L., Sternberg, L. S. L., Ribeiro, A., and Moreira, M. Z.: Using stable  
379 isotopes to determine sources of evaporated water to the atmosphere in the Amazon basin,  
380 *J Hydrol.*, 183, 191-204, [http://dx.doi.org/10.1016/0022-1694\(95\)02974-5](http://dx.doi.org/10.1016/0022-1694(95)02974-5), 1996.

381 McMahan, J. P.: DDT-treatment of rivers for eradication of Simuliidae, B. World Health Organ.,  
382 National Center for Biotechnology Information, Bethesda MD, USA, 541 pp., 1957.

383 Monteith, J. L., and Unsworth, M. H.: Principles of environmental physics: Plants, animals, and the  
384 atmosphere, Academic Press, Oxford, UK, 357 pp., 2013.

385 Phillips, D. L., and Gregg, J. W.: Uncertainty in source partitioning using stable isotopes, *Oecologia*,  
386 127, 171-179, <http://dx.doi.org/10.1007/s004420000578>, 2001.

387 Ponton, C., West, A. J., Feakins, S. J., and Galy, V.: Leaf wax biomarkers in transit record river  
388 catchment composition, *Geophys Res Lett*, 41, <http://dx.doi.org/10.1002/2014GL061328>,  
389 2014.

- 390 Rapp, J. M., and Silman, M. R.: Diurnal, seasonal, and altitudinal trends in microclimate across a  
391 tropical montane cloud forest, *Clim. Res.*, 55, 17-32, <http://dx.doi.org/10.3354/cr01127>,  
392 2012.
- 393 Rhodes, A. L., Guswa, A. J., and Newell, S. E.: Seasonal variation in the stable isotopic composition of  
394 precipitation in the tropical montane forests of Monteverde, Costa Rica, *Water Resour. Res.*,  
395 42, W11402, <http://dx.doi.org/10.1029/2005WR004535>, 2006.
- 396 Rozanski, K., Araguás-Araguás, L., and Gonfiantini, R.: Isotopic Patterns in Modern Global  
397 Precipitation, in: *Climate Change in Continental Isotopic Records*, edited by: Swart, P. K.,  
398 Lohman, K. C., McKenzie, J., and Savin, S., American Geophysical Union, Washington, DC, 1-  
399 36, 1993.
- 400 Salati, E., Dall'Olio, A., Matsui, E., and Gat, J. R.: Recycling of water in the Amazon basin: an isotopic  
401 study, *Water Resour. Res.*, 15, 1250-1258, <http://dx.doi.org/10.1029/WR015i005p01250>,  
402 1979.
- 403 Scholl, M., Eugster, W., and Burkard, R.: Understanding the role of fog in forest hydrology: stable  
404 isotopes as tools for determining input and partitioning of cloud water in montane forests,  
405 *Hydrol. Process.*, 25, 353-366, <http://dx.doi.org/10.1002/hyp.7762>, 2011.
- 406 Scholl, M. A., Giambelluca, T. W., Gingerich, S. B., Nullet, M. A., and Loope, L. L.: Cloud water in  
407 windward and leeward mountain forests: The stable isotope signature of orographic cloud  
408 water, *Water Resour. Res.*, 43, W12411, <http://dx.doi.org/10.1029/2007WR006011>, 2007.
- 409 SENAMHI: Clima: Datos históricos Peru, [http://www.senamhi.gob.pe/main\\_mapa.php?t=dHi](http://www.senamhi.gob.pe/main_mapa.php?t=dHi), (last  
410 access: May 2012), 2012.
- 411 Torres, M. A., West, A. J., and Clark, K. E.: Geomorphic regime modulates hydrologic control of  
412 chemical weathering in the Andes-Amazon, *Geochim Cosmochim Acta*, in review.
- 413 Windhorst, D., Waltz, T., Timbe, E., Frede, H. G., and Breuer, L.: Impact of elevation and weather  
414 patterns on the isotopic composition of precipitation in a tropical montane rainforest,  
415 *Hydrol. Earth Syst. Sci.*, 17, 409-419, <http://dx.doi.org/10.5194/hess-17-409-2013>, 2013.
- 416 Zelazowski, P., Sayer, A. M., Thomas, G. E., and Grainger, R. G.: Reconciling satellite-derived  
417 atmospheric properties with fine-resolution land imagery: Insights for atmospheric  
418 correction, *J Geophys Res-Atmos*, 116, <http://dx.doi.org/10.1029/2010JD015488>, 2011.

419

420

421

422 **Supplementary tables**

423

TABLE S1: Catchment-wide mean monthly estimated rainfall (mm month<sup>-1</sup>) 1998 to 2012 showing seasonality.

| Kosñipata catchment measured at: | Jan.   | Feb.   | March  | April   | May    | June   | July   | Aug.   | Sept.  | Oct.    | Nov.    | Dec.   |
|----------------------------------|--------|--------|--------|---------|--------|--------|--------|--------|--------|---------|---------|--------|
| San Pedro                        | 399±43 | 411±64 | 416±41 | 218±20  | 135±14 | 130±13 | 135±14 | 129±12 | 156±15 | 208±23  | 224±23  | 317±39 |
| Wayqecha                         | 338±40 | 351±57 | 355±38 | 171±18  | 94±13  | 91±12  | 94±13  | 89±11  | 114±14 | 162±22  | 177±22  | 262±36 |
| Months                           | 15     | 15     | 15     | 15      | 15     | 15     | 15     | 15     | 15     | 15      | 15      | 15     |
| Season*                          | wet    | wet    | wet    | wet-dry | dry    | dry    | dry    | dry    | dry    | dry-wet | dry-wet | wet    |

\*Rainfall patterns indicate that the wet season runs from December to March (green), the wet-dry transition season runs throughout April (blue), the dry season runs from May until September (yellow), and the dry-wet transition season runs through October and November (red). Rainfall is corrected for wind-induced loss. Uncertainties are 2 × standard error.

424

TABLE S2: Station descriptions for meteorological data from the Kosñipata catchment.

| # in Fig. 1a <sup>o</sup> | Meteorological station | Gauge type                            | Elevation (masl) | Lat/long coordinates (S, W)     | Land cover type        | Landscape description                               | Aspect (°) <sup>^^</sup> | Slope (°) <sup>^^</sup> | $T_{max}$ (°C) | $RH_{min}$ (%) | $R_n$ (W m <sup>-2</sup> ) | Meteorological station annual rainfall (mm yr <sup>-1</sup> ) | TRMM calibrated rainfall <sup>§</sup> (corrected rainfall) from 1998 to 2012 (mm yr <sup>-1</sup> ) | AET         | AET <sub>i</sub> | AET <sub>c</sub> |     |
|---------------------------|------------------------|---------------------------------------|------------------|---------------------------------|------------------------|-----------------------------------------------------|--------------------------|-------------------------|----------------|----------------|----------------------------|---------------------------------------------------------------|-----------------------------------------------------------------------------------------------------|-------------|------------------|------------------|-----|
| 1                         | Acjanaco               | manual                                | 3460             | 13°11'45.674",<br>71°37'14.818" | Puna grassland         | Rolling mountain top                                | 140                      | 8.6                     | 79             | 12.1           | 65.0 <sup>^</sup>          | N/A                                                           | 1908 <sup>a</sup>                                                                                   | 1800 (1845) | N/A              | N/A              | N/A |
|                           | Acjanaco <sup>h</sup>  | Skye Instruments                      |                  |                                 |                        |                                                     |                          |                         | 12             | 11.6           | 76.1                       | 74 <sup>#</sup>                                               | 1698                                                                                                | N/A         | 710              | 104              | 250 |
| 2                         | TU 3450                | Smart Sensors/HOBO                    | 3450             | 13°6'48.749",<br>71°36'27.306"  | Transition /Scrub-land | Rolling mountain top/peak of a mountain ridge       | 356                      | 26.7                    | 16             | 11.9           | 72.3                       | 62 <sup>*e</sup>                                              | 2148 <sup>b</sup>                                                                                   | 2516 (2579) | 470              | 175              | 274 |
| 3                         | Wayqecha               | Campbell Scientific                   | 2900             | 13°11'18.434",<br>71°35'9.667"  | UMCF                   | Mountain slope just below tree line, far from ridge | 122                      | 32.8                    | 45             | 16.2           | 70.0                       | 78 <sup>*f</sup>                                              | 1752 <sup>c</sup>                                                                                   | 1600 (1640) | 652              | 190              | 435 |
| 4                         | TU 2750                | Smart Sensors/HOBO                    | 2750             | 13°6'18.537",<br>71°35'22.26"   | UMCF                   | Mountain ridge                                      | 319                      | 28                      | 19             | 16.0           | 75.7                       | 82 <sup>*f</sup>                                              | 2940 <sup>b</sup>                                                                                   | 3154 (3233) | 696              | 262              | 402 |
| 5                         | Rocotal                | manual                                | 2090             | 13°6'47.575",<br>71°34'14.673"  | UMCF                   | Mountain slope near road                            | 70.5                     | 32.9                    | 97             | 20.6           | 76.4 <sup>^</sup>          | N/A                                                           | 4140 <sup>a</sup>                                                                                   | 4152 (4256) | N/A              | N/A              | N/A |
| 6                         | TU 1800                | Smart Sensors/HOBO                    | 1850             | 13°4'11.331",<br>71°33'30.215"  | LMCF                   | Mid – mountain slope                                | 321                      | 30.6                    | 18             | 20.3           | 72.4                       | 100 <sup>*g</sup>                                             | 4116 <sup>b</sup>                                                                                   | 3998 (4098) | 916              | 308              | 567 |
| 7                         | San Pedro <sup>#</sup> | Vantage Pro 2 Plus, Davis Instruments | 1450             | 13°3'21.219",<br>71°32'48.841"  | LMRF                   | Mountain slope near the river                       | 183                      | 13.6                    | 13             | 23.7           | 77.0                       | 98 <sup>#g</sup>                                              | 5436 <sup>d</sup>                                                                                   | 4831 (4952) | 1008             | 328              | 631 |
|                           | San Pedro <sup>#</sup> | Skye Instruments                      | 1360             | 13°3'20.191",<br>71°32'38.305"  | LMRF                   |                                                     |                          |                         | 183            | 4              |                            |                                                               |                                                                                                     |             |                  |                  |     |

|   |              |                    |      |                                |               |                                            |     |      |    |      |                   |                  |                   |             |     |     |     |
|---|--------------|--------------------|------|--------------------------------|---------------|--------------------------------------------|-----|------|----|------|-------------------|------------------|-------------------|-------------|-----|-----|-----|
| 8 | SP 1500      | Smart Sensors/HOBO | 1500 | 13°2'57.577",<br>71°32'11.579" | LMCF/LM<br>RF | Mountain<br>slope                          | 170 | 29.5 | 13 | 22.0 | 74.9              | 95* <sup>g</sup> | 4956 <sup>b</sup> | 5191 (5321) | 908 | 328 | 540 |
| 9 | Chonta-chaca | manual             | 887  | 13°1'26.091",<br>71°28'4.887"  | LTRF          | Low<br>mountains<br>near road<br>and river | -1  | 2.1  | 80 | 27.3 | 83.6 <sup>^</sup> | N/A              | 5316 <sup>a</sup> | 5260 (5392) | N/A | N/A | N/A |

<sup>v</sup> Stations 2, 3, 4, 6, 7 and 8 are run by the ABERG consortium.

<sup>a</sup> data from (SENAMHI, 2012)

<sup>b</sup> data from (Rapp and Silman, 2012)

<sup>c</sup> data from (Girardin et al., 2014)

<sup>d</sup> data from (Huaraca Huasco et al., 2014; ACCA, 2012)

<sup>‡</sup> Data for the two San Pedro meteorological stations were merged since they were located close to one another and totalled only 13 months of data.

<sup>§</sup> TRMM calibrated rainfall ( $\text{mm yr}^{-1}$ ) from 1998 to 2012 ( $n = 180$  months) was determined for each meteorological station as described in the text. Data in parenthesis is rainfall corrected for wind-induced loss at 2.5% (Table S3).

UMCF = Upper montane cloud forest, LMCF = Lower montane cloud forest, LMRF = Lower montane rain forest, LTRF = Lower tropical rainforest.

<sup>^^</sup> Aspect and slope were determined by using SRTM DEM at 90 m x 90 m resolution.

$n$  = available months of meteorological station data.

$T_{\text{max}}$  = mean max daily temperature averaged monthly

$RH_{\text{min}}$  = mean daily minimum relative humidity averaged monthly, <sup>^</sup> estimated  $RH_{\text{min}}$  using dry and wet bulb temperatures assuming atmospheric pressure was 1013 hPa, and  $R_n$  = mean daily net radiation averaged monthly.

\* Photosynthetic active radiation (PAR) ( $\mu\text{mol PAR m}^{-2} \text{s}^{-1}$ ) was converted to estimate  $R_n$  by first dividing it by 2.1 to convert it to solar radiation ( $R_s$ ) ( $\text{W m}^{-2}$ ) (Monteith and Unsworth, 2013) and then converted to  $R_n$ .

Solar radiation was converted to estimate net radiation ( $R_n$ ) by multiplying  $R_s$  by 0.5<sup>e</sup> (Gilmanov et al., 2007), 0.7<sup>f</sup> (Holwerda, 2005) or 0.75<sup>g</sup> (Fisher et al., 2010; Malhi et al., 2002) Actual evapotranspiration (AET) estimated using meteorological station data in the PT-JPL model developed by Fisher et al. (2008).

AET is composed of rainfall interception (AETi), canopy transpiration (AETc), and soil evaporation (AETs).

<sup>h</sup> data from 2013 - 2014 collected by Y. Malhi and used only in the AET analysis.

425

426

427

428

429

430

431

432

TABLE S3: Wind speed and wind-induced rainfall loss for the Kosñipata catchment

|         | Wind velocity (m s <sup>-1</sup> ) | Rainfall loss due to wind (%)* |
|---------|------------------------------------|--------------------------------|
| Wet     | 1.22±0.08                          | 2.41±0.34                      |
| Wet-dry | 1.16±0.12                          | 2.19±0.37                      |
| Dry     | 1.40±0.24                          | 2.41±0.76                      |
| Dry-wet | 1.37±0.08                          | 2.98±0.34                      |
| Annual  | 1.32±0.17                          | 2.50±0.56                      |

Meteorological stations used were TR 3750, TR 2750, TR 1800, and SP 1500 (see Table S2 for descriptions).

\*Rainfall loss due to wind around the rain gauge was estimated based on equations 1 and 2 from (Holwerda et al., 2006).  
Uncertainties are propagated 1 $\sigma$  errors.



TABLE S4a: Water isotope data for rainfall collected in the Kosñipata catchment

| Season     | Date<br>(dd-mmm-yy) | Elevation<br>(m) | $\delta^{18}\text{O}$<br>(‰) | $\sigma \delta^{18}\text{O}$<br>(‰) | $\delta\text{D}$<br>(‰) | $\sigma \delta\text{D}$<br>(‰) | Dxs<br>(‰) | $\sigma \text{Dxs}$<br>(‰) |
|------------|---------------------|------------------|------------------------------|-------------------------------------|-------------------------|--------------------------------|------------|----------------------------|
| Dry season | 13-Jun-11           | 1360             | -4.63                        | 0.10                                | -18.89                  | 0.57                           | 18.18      | 0.98                       |
| Wet season | 19-Dec-10           | 1360             | -2.46                        | 0.14                                | -17.70                  | 0.98                           | 1.95       | 1.46                       |
| Wet season | 22-Mar-11           | 1360             | -12.44                       | 0.16                                | -92.29                  | 0.45                           | 7.22       | 1.36                       |
| Wet season | 27-Dec-10           | 1360             | -15.22                       | 0.24                                | -111.36                 | 0.45                           | 10.40      | 1.98                       |
| Wet season | 24-Jan-11           | 1360             | -16.49                       | 0.06                                | -129.76                 | 0.74                           | 2.16       | 0.87                       |
| Wet season | 21-Feb-11           | 1360             | -18.58                       | 0.08                                | -138.96                 | 0.41                           | 9.66       | 0.75                       |
| Dry season | 06-Jul-09           | 1500             | -7.19                        | 0.08                                | -40.73                  | 0.50                           | 16.82      | 0.81                       |
| Dry season | 06-Jul-09           | 1500             | -7.18                        | 0.08                                | -40.69                  | 0.50                           | 16.71      | 0.81                       |
| Dry season | 06-Jul-09           | 1500             | -7.16                        | 0.08                                | -40.73                  | 0.50                           | 16.52      | 0.81                       |
| Dry season | 07-Jul-09           | 1500             | -7.39                        | 0.08                                | -41.90                  | 0.50                           | 17.25      | 0.81                       |
| Dry season | 07-Jul-09           | 1500             | -7.41                        | 0.08                                | -42.00                  | 0.50                           | 17.30      | 0.81                       |
| Dry season | 07-Jul-09           | 1500             | -7.57                        | 0.08                                | -42.96                  | 0.50                           | 17.58      | 0.81                       |
| Dry season | 14-Sep-09           | 1500             | -2.55                        | 0.08                                | 1.81                    | 0.50                           | 22.19      | 0.81                       |
| Dry season | 14-Sep-09           | 1500             | -2.08                        | 0.08                                | 4.46                    | 0.50                           | 21.08      | 0.81                       |
| Dry season | 14-Sep-09           | 1500             | -1.93                        | 0.08                                | 7.70                    | 0.50                           | 23.13      | 0.81                       |
| Dry season | 15-Sep-09           | 1500             | -1.56                        | 0.08                                | 3.72                    | 0.50                           | 16.19      | 0.81                       |
| Dry season | 16-Sep-09           | 1500             | -2.70                        | 0.08                                | 0.21                    | 0.50                           | 21.84      | 0.81                       |
| Dry season | 16-Sep-09           | 1500             | -0.94                        | 0.08                                | 9.36                    | 0.50                           | 16.85      | 0.81                       |
| Dry season | 05-Jul-09           | 2000             | -6.62                        | 0.08                                | -35.67                  | 0.50                           | 17.26      | 0.81                       |
| Dry season | 05-Jul-09           | 2000             | -6.57                        | 0.08                                | -35.59                  | 0.50                           | 16.95      | 0.81                       |
| Dry season | 05-Jul-09           | 2000             | -6.58                        | 0.08                                | -35.49                  | 0.50                           | 17.17      | 0.81                       |
| Dry season | 12-Sep-09           | 2000             | -1.61                        | 0.08                                | 6.26                    | 0.50                           | 19.17      | 0.81                       |
| Dry season | 12-Sep-09           | 2000             | -3.10                        | 0.08                                | -2.88                   | 0.50                           | 21.89      | 0.81                       |
| Dry season | 12-Sep-09           | 2000             | -1.75                        | 0.08                                | 6.11                    | 0.50                           | 20.08      | 0.81                       |
| Dry season | 12-Sep-09           | 2000             | -1.59                        | 0.08                                | 6.70                    | 0.50                           | 19.42      | 0.81                       |
| Wet season | 20-Feb-11           | 2040             | -22.81                       | 0.29                                | -168.28                 | 1.34                           | 14.18      | 2.65                       |
| Wet season | 20-Feb-11           | 2050             | -22.50                       | 0.14                                | -170.76                 | 0.87                           | 9.25       | 1.39                       |
| Wet season | 20-Feb-11           | 2130             | -14.71                       | 0.16                                | -105.35                 | 0.77                           | 12.35      | 1.51                       |
| Dry season | 28-Jun-10           | 2290             | -3.88                        | 0.06                                | -16.21                  | 0.91                           | 14.86      | 1.03                       |
| Dry season | 28-Jun-10           | 2290             | -6.73                        | 0.20                                | -36.95                  | 0.82                           | 16.86      | 1.80                       |
| Wet season | 22-Mar-10           | 2290             | -8.32                        | 0.27                                | -56.74                  | 0.52                           | 9.80       | 2.19                       |
| Wet season | 19-Feb-11           | 2290             | -10.40                       | 0.07                                | -72.11                  | 0.33                           | 11.08      | 0.64                       |
| Wet season | 27-Dec-10           | 2290             | -17.72                       | 0.08                                | -136.09                 | 0.60                           | 5.70       | 0.89                       |
| Wet season | 19-Feb-11           | 2300             | -14.52                       | 0.09                                | -100.38                 | 0.70                           | 15.77      | 0.99                       |
| Wet season | 19-Feb-11           | 2400             | -12.46                       | 0.17                                | -87.71                  | 0.32                           | 11.93      | 1.37                       |
| Dry season | 03-Jul-07           | 2500             | -5.69                        | 0.08                                | -28.75                  | 0.50                           | 16.76      | 0.81                       |
| Dry season | 03-Jul-07           | 2500             | -5.50                        | 0.08                                | -27.76                  | 0.50                           | 16.24      | 0.81                       |
| Dry season | 03-Jul-07           | 2500             | -5.82                        | 0.08                                | -29.33                  | 0.50                           | 17.22      | 0.81                       |
| Dry season | 03-Jul-07           | 2500             | -7.97                        | 0.08                                | -45.49                  | 0.50                           | 18.25      | 0.81                       |

|            |           |      |       |      |        |      |       |      |
|------------|-----------|------|-------|------|--------|------|-------|------|
| Dry season | 03-Jul-07 | 2500 | -7.96 | 0.08 | -45.77 | 0.50 | 17.90 | 0.81 |
| Dry season | 03-Jul-07 | 2500 | -7.95 | 0.08 | -46.08 | 0.50 | 17.51 | 0.81 |
| Dry season | 08-Sep-09 | 2500 | -0.85 | 0.08 | 14.33  | 0.50 | 21.16 | 0.81 |
| Dry season | 08-Sep-09 | 2500 | -0.89 | 0.08 | 14.32  | 0.50 | 21.48 | 0.81 |
| Dry season | 08-Sep-09 | 2500 | -0.75 | 0.08 | 15.40  | 0.50 | 21.41 | 0.81 |
| Dry season | 08-Sep-09 | 2500 | -0.85 | 0.08 | 14.12  | 0.50 | 20.93 | 0.81 |
| Dry season | 08-Sep-09 | 2500 | -0.78 | 0.08 | 14.90  | 0.50 | 21.17 | 0.81 |
| Dry season | 08-Sep-09 | 2500 | -0.96 | 0.08 | 14.23  | 0.50 | 21.93 | 0.81 |
| Dry season | 10-Sep-09 | 2500 | -2.19 | 0.08 | 3.70   | 0.50 | 21.18 | 0.81 |
| Dry season | 10-Sep-09 | 2500 | -4.25 | 0.08 | -12.50 | 0.50 | 21.47 | 0.81 |
| Dry season | 10-Sep-09 | 2500 | -3.89 | 0.08 | -10.05 | 0.50 | 21.08 | 0.81 |
| Dry season | 10-Sep-09 | 2500 | -2.32 | 0.08 | 2.95   | 0.50 | 21.47 | 0.81 |
| Dry season | 10-Sep-09 | 2500 | -4.45 | 0.08 | -14.42 | 0.50 | 21.19 | 0.81 |
| Dry season | 10-Sep-09 | 2500 | -3.78 | 0.08 | -9.74  | 0.50 | 20.54 | 0.81 |
| Dry season | 01-Jul-09 | 3000 | -7.00 | 0.08 | -41.47 | 0.50 | 14.51 | 0.81 |
| Dry season | 01-Jul-09 | 3000 | -6.92 | 0.08 | -40.57 | 0.50 | 14.83 | 0.81 |
| Dry season | 01-Jul-09 | 3000 | -6.83 | 0.08 | -40.99 | 0.50 | 13.66 | 0.81 |
| Dry season | 01-Jul-09 | 3000 | -7.15 | 0.08 | -42.20 | 0.50 | 15.03 | 0.81 |
| Dry season | 01-Jul-09 | 3000 | -7.11 | 0.08 | -41.47 | 0.50 | 15.42 | 0.81 |
| Dry season | 01-Jul-09 | 3000 | -7.38 | 0.08 | -44.05 | 0.50 | 14.97 | 0.81 |
| Dry season | 09-Sep-09 | 3000 | -1.76 | 0.08 | 8.20   | 0.50 | 22.24 | 0.81 |
| Dry season | 09-Sep-09 | 3000 | -1.68 | 0.08 | 9.05   | 0.50 | 22.47 | 0.81 |
| Dry season | 09-Sep-09 | 3000 | -2.17 | 0.08 | 5.89   | 0.50 | 23.21 | 0.81 |
| Dry season | 09-Sep-09 | 3000 | -2.15 | 0.08 | 6.22   | 0.50 | 23.43 | 0.81 |
| Dry season | 09-Sep-09 | 3000 | -1.29 | 0.08 | 9.82   | 0.50 | 20.10 | 0.81 |

434

TABLE S4b: Water isotope data for cloud water collected in the Kosñipata catchment

|             | Date        | Elevation | $\delta^{18}\text{O}$ | $\sigma \delta^{18}\text{O}^*$ | $\delta\text{D}$ | $\sigma \delta\text{D}^*$ | Dxs   | $\sigma \text{Dxs}^*$ |
|-------------|-------------|-----------|-----------------------|--------------------------------|------------------|---------------------------|-------|-----------------------|
|             | (dd-mmm-yy) | (m)       | (‰)                   | (‰)                            | (‰)              | (‰)                       | (‰)   | (‰)                   |
| Cloud water | 14-Sep-09   | 1500      | -1.40                 | 0.08                           | 15.34            | 0.50                      | 26.57 | 0.81                  |
| Cloud water | 14-Sep-09   | 1500      | -0.47                 | 0.08                           | 19.81            | 0.50                      | 23.60 | 0.81                  |
| Cloud water | 14-Sep-09   | 1500      | -1.48                 | 0.08                           | 14.71            | 0.50                      | 26.56 | 0.81                  |
| Cloud water | 14-Sep-09   | 1500      | -1.86                 | 0.08                           | 14.35            | 0.50                      | 29.21 | 0.81                  |
| Cloud water | 14-Sep-09   | 1500      | -5.09                 | 0.08                           | -0.04            | 0.50                      | 40.65 | 0.81                  |
| Cloud water | 14-Sep-09   | 1500      | -2.71                 | 0.08                           | 11.87            | 0.50                      | 33.51 | 0.81                  |
| Cloud water | 12-Sep-09   | 2000      | -3.81                 | 0.08                           | -1.71            | 0.50                      | 28.76 | 0.81                  |
| Cloud water | 12-Sep-09   | 2000      | -2.40                 | 0.08                           | 3.30             | 0.50                      | 22.48 | 0.81                  |
| Cloud water | 12-Sep-09   | 2000      | -7.32                 | 0.08                           | -18.41           | 0.50                      | 40.15 | 0.81                  |
| Cloud water | 12-Sep-09   | 2000      | -5.77                 | 0.08                           | -11.47           | 0.50                      | 34.69 | 0.81                  |
| Cloud water | 12-Sep-09   | 2000      | -6.09                 | 0.08                           | -12.16           | 0.50                      | 36.53 | 0.81                  |
| Cloud water | 03-Jul-07   | 2500      | -8.29                 | 0.08                           | -41.50           | 0.50                      | 24.80 | 0.81                  |
| Cloud water | 03-Jul-07   | 2500      | -16.04                | 0.08                           | -68.33           | 0.50                      | 60.00 | 0.81                  |
| Cloud water | 03-Jul-07   | 2500      | -16.94                | 0.08                           | -68.80           | 0.50                      | 66.75 | 0.81                  |

|             |           |      |        |      |         |      |       |      |
|-------------|-----------|------|--------|------|---------|------|-------|------|
| Cloud water | 03-Jul-07 | 2500 | -12.28 | 0.08 | -42.91  | 0.50 | 55.36 | 0.81 |
| Cloud water | 03-Jul-07 | 2500 | -11.65 | 0.08 | -52.50  | 0.50 | 40.68 | 0.81 |
| Cloud water | 03-Jul-07 | 2500 | -13.10 | 0.08 | -64.09  | 0.50 | 40.74 | 0.81 |
| Cloud water | 10-Sep-09 | 2500 | -4.99  | 0.08 | -9.89   | 0.50 | 30.04 | 0.81 |
| Cloud water | 10-Sep-09 | 2500 | -3.31  | 0.08 | -3.67   | 0.50 | 22.83 | 0.81 |
| Cloud water | 10-Sep-09 | 2500 | -3.99  | 0.08 | -10.70  | 0.50 | 21.21 | 0.81 |
| Cloud water | 10-Sep-09 | 2500 | -7.55  | 0.08 | -23.47  | 0.50 | 36.93 | 0.81 |
| Cloud water | 10-Sep-09 | 2500 | -5.36  | 0.08 | -7.96   | 0.50 | 34.92 | 0.81 |
| Cloud water | 10-Sep-09 | 2500 | -7.14  | 0.08 | -16.74  | 0.50 | 40.40 | 0.81 |
| Cloud water | 01-Jul-09 | 3000 | -12.38 | 0.08 | -66.54  | 0.50 | 32.50 | 0.81 |
| Cloud water | 01-Jul-09 | 3000 | -18.29 | 0.08 | -85.17  | 0.50 | 61.14 | 0.81 |
| Cloud water | 01-Jul-09 | 3000 | -16.31 | 0.08 | -101.23 | 0.50 | 29.27 | 0.81 |
| Cloud water | 01-Jul-09 | 3000 | -18.31 | 0.08 | -86.05  | 0.50 | 60.40 | 0.81 |
| Cloud water | 01-Jul-09 | 3000 | -12.46 | 0.08 | -56.25  | 0.50 | 43.45 | 0.81 |
| Cloud water | 01-Jul-09 | 3000 | -16.89 | 0.08 | -75.90  | 0.50 | 59.19 | 0.81 |
| Cloud water | 09-Sep-09 | 3000 | -6.02  | 0.08 | -10.35  | 0.50 | 37.85 | 0.81 |
| Cloud water | 09-Sep-09 | 3000 | -6.00  | 0.08 | -11.65  | 0.50 | 36.33 | 0.81 |
| Cloud water | 09-Sep-09 | 3000 | -9.00  | 0.08 | -29.96  | 0.50 | 42.03 | 0.81 |
| Cloud water | 09-Sep-09 | 3000 | -8.23  | 0.08 | -32.36  | 0.50 | 33.50 | 0.81 |
| Cloud water | 09-Sep-09 | 3000 | -6.13  | 0.08 | -21.52  | 0.50 | 27.54 | 0.81 |
| Cloud water | 09-Sep-09 | 3000 | -5.34  | 0.08 | -19.10  | 0.50 | 23.64 | 0.81 |
| Cloud water | 30-Jun-09 | 3600 | -9.89  | 0.08 | -48.36  | 0.50 | 30.76 | 0.81 |
| Cloud water | 30-Jun-09 | 3600 | -11.76 | 0.08 | -54.14  | 0.50 | 39.94 | 0.81 |
| Cloud water | 30-Jun-09 | 3600 | -13.24 | 0.08 | -62.96  | 0.50 | 42.99 | 0.81 |
| Cloud water | 30-Jun-09 | 3600 | -13.53 | 0.08 | -62.00  | 0.50 | 46.21 | 0.81 |
| Cloud water | 30-Jun-09 | 3600 | -14.47 | 0.08 | -68.30  | 0.50 | 47.43 | 0.81 |
| Cloud water | 30-Jun-09 | 3600 | -14.04 | 0.08 | -64.77  | 0.50 | 47.57 | 0.81 |
| Cloud water | 07-Sep-09 | 3600 | -3.49  | 0.08 | 8.30    | 0.50 | 36.23 | 0.81 |
| Cloud water | 07-Sep-09 | 3600 | -4.96  | 0.08 | 6.66    | 0.50 | 46.34 | 0.81 |
| Cloud water | 07-Sep-09 | 3600 | -8.70  | 0.08 | -12.75  | 0.50 | 56.83 | 0.81 |
| Cloud water | 07-Sep-09 | 3600 | -4.16  | 0.08 | 13.84   | 0.50 | 47.08 | 0.81 |
| Cloud water | 07-Sep-09 | 3600 | -8.99  | 0.08 | -14.35  | 0.50 | 57.57 | 0.81 |
| Cloud water | 07-Sep-09 | 3600 | -11.45 | 0.08 | -61.24  | 0.50 | 30.34 | 0.81 |

---

\* Characteristic analytical uncertainties reported by Horwath (2011).

---

TABLE S5: Catchment-wide annual rainfall estimates (mm yr<sup>-1</sup>)

| Rank | Year      | Kosñipata catchment -<br>San Pedro | Kosñipata catchment –<br>Wayqecha sub-basin |
|------|-----------|------------------------------------|---------------------------------------------|
| 1    | 2001      | 3265                               | 2654                                        |
| 2    | 2010      | 3240                               | 2631                                        |
| 3    | 2011      | 3217                               | 2611                                        |
| 4    | 2002      | 3155                               | 2552                                        |
| 5    | 2003      | 2981                               | 2390                                        |
| 6    | 2009      | 2937                               | 2351                                        |
| 7    | 2006      | 2845                               | 2265                                        |
| 8    | 2012      | 2833                               | 2254                                        |
| 9    | 2008      | 2817                               | 2239                                        |
| 10   | 1999      | 2773                               | 2199                                        |
| 11   | 2007      | 2751                               | 2179                                        |
| 12   | 1998      | 2655                               | 2084                                        |
| 13   | 2000      | 2650                               | 2084                                        |
| 14   | 2004      | 2645                               | 2080                                        |
| 15   | 2005      | 2759                               | 1908                                        |
| Mean | 1998-2012 | 2881 ± 124                         | 2299 ± 115                                  |

Uncertainties are 2 x standard error of annual totals.

Rainfall values include wind-induced rainfall loss correction of 2.5 %.

436

437

438

TABLE S6: Water isotope data of stream water collected from the Kosñipata River at the San Pedro gauging station

| Date and hour<br>(dd-mmm-yy hr) <sup>#</sup> | $\delta^{18}\text{O}$ (‰) | $\sigma \delta^{18}\text{O}$<br>(‰) | $\delta\text{D}$<br>(‰) | $\sigma \delta\text{D}$<br>(‰) | Dxs   | $\sigma$ Dxs |
|----------------------------------------------|---------------------------|-------------------------------------|-------------------------|--------------------------------|-------|--------------|
| 01-Nov-09                                    | -11.62                    | 0.14                                | -77.33                  | 0.65                           | 15.64 | 1.32         |
| 07-Nov-09                                    | -10.75                    | 0.15                                | -67.95                  | 0.42                           | 18.03 | 1.29         |
| 15-Nov-09                                    | -11.47                    | 0.14                                | -74.89                  | 0.32                           | 16.89 | 1.20         |
| 30-Nov-09                                    | -12.10                    | 0.14                                | -80.46                  | 0.25                           | 16.34 | 1.16         |
| 30-Jan-10 00                                 | -13.44                    | 0.15                                | -91.94                  | 0.19                           | 15.61 | 1.20         |
| 04-Feb-10 03                                 | -12.39                    | 0.14                                | -84.13                  | 0.21                           | 14.96 | 1.15         |
| 04-Feb-10 09                                 | -12.56                    | 0.14                                | -85.54                  | 0.19                           | 14.97 | 1.15         |
| 04-Feb-10 15                                 | -12.21                    | 0.14                                | -83.56                  | 0.11                           | 14.10 | 1.14         |
| 04-Feb-10 21                                 | -12.38                    | 0.14                                | -84.32                  | 0.03                           | 14.72 | 1.13         |
| 05-Feb-10 09                                 | -12.57                    | 0.14                                | -85.21                  | 0.29                           | 15.35 | 1.17         |
| 05-Feb-10 15                                 | -12.45                    | 0.14                                | -84.67                  | 0.42                           | 14.90 | 1.21         |
| 05-Feb-10 21                                 | -12.35                    | 0.14                                | -84.08                  | 0.28                           | 14.75 | 1.17         |
| 06-Feb-10 09                                 | -12.47                    | 0.14                                | -85.04                  | 0.29                           | 14.72 | 1.17         |
| 06-Feb-10 15                                 | -12.48                    | 0.14                                | -85.09                  | 0.31                           | 14.75 | 1.18         |
| 07-Feb-10                                    | -12.55                    | 0.14                                | -86.01                  | 0.16                           | 14.41 | 1.15         |
| 07-Feb-10 03                                 | -12.44                    | 0.14                                | -84.94                  | 0.48                           | 14.56 | 1.23         |
| 07-Feb-10 09                                 | -12.58                    | 0.14                                | -84.71                  | 0.51                           | 15.91 | 1.25         |
| 07-Feb-10 15                                 | -12.55                    | 0.14                                | -84.50                  | 0.33                           | 15.90 | 1.18         |
| 07-Feb-10 21                                 | -12.52                    | 0.14                                | -85.04                  | 0.28                           | 15.12 | 1.17         |
| 08-Feb-10 03                                 | -12.44                    | 0.14                                | -85.22                  | 0.29                           | 14.29 | 1.17         |
| 08-Feb-10 09                                 | -12.59                    | 0.14                                | -84.27                  | 0.07                           | 16.48 | 1.14         |
| 08-Feb-10 15                                 | -12.63                    | 0.14                                | -84.58                  | 0.09                           | 16.47 | 1.14         |
| 08-Feb-10 21                                 | -12.60                    | 0.14                                | -84.10                  | 0.39                           | 16.71 | 1.20         |
| 09-Feb-10 03                                 | -12.60                    | 0.14                                | -85.03                  | 0.22                           | 15.79 | 1.16         |
| 09-Feb-10 09                                 | -12.69                    | 0.14                                | -85.19                  | 0.25                           | 16.33 | 1.17         |
| 09-Feb-10 15                                 | -12.69                    | 0.14                                | -85.71                  | 0.13                           | 15.80 | 1.15         |
| 10-Feb-10 03                                 | -12.68                    | 0.14                                | -85.25                  | 0.43                           | 16.22 | 1.22         |
| 11-Feb-10 09                                 | -12.63                    | 0.14                                | -85.00                  | 0.46                           | 16.08 | 1.23         |
| 11-Feb-10 21                                 | -11.80                    | 0.14                                | -78.70                  | 0.11                           | 15.72 | 1.15         |
| 12-Feb-10 05                                 | -11.93                    | 0.14                                | -81.34                  | 0.39                           | 14.12 | 1.20         |
| 12-Feb-10 09                                 | -12.18                    | 0.14                                | -82.38                  | 0.22                           | 15.10 | 1.15         |
| 12-Feb-10 14                                 | -12.17                    | 0.14                                | -81.88                  | 0.54                           | 15.46 | 1.26         |
| 22-Feb-10                                    | -12.53                    | 0.14                                | -85.18                  | 0.68                           | 15.03 | 1.32         |
| 22-Mar-10                                    | -12.51                    | 0.14                                | -85.15                  | 0.83                           | 14.90 | 1.41         |
| 29-Mar-10                                    | -12.53                    | 0.14                                | -85.63                  | 0.07                           | 14.64 | 1.14         |
| 05-Apr-10                                    | -12.09                    | 0.14                                | -80.72                  | 0.53                           | 16.03 | 1.25         |
| 25-Apr-10                                    | -12.46                    | 0.14                                | -83.80                  | 0.50                           | 15.85 | 1.24         |
| 16-May-10                                    | -12.38                    | 0.14                                | -83.30                  | 0.24                           | 15.72 | 1.16         |
| 26-May-10                                    | -12.14                    | 0.14                                | -81.43                  | 1.18                           | 15.65 | 1.64         |
| 31-May-10                                    | -11.39                    | 0.15                                | -74.59                  | 0.30                           | 16.56 | 1.20         |
| 14-Jun-10                                    | -12.20                    | 0.14                                | -81.47                  | 0.13                           | 16.10 | 1.14         |
| 12-Jul-10                                    | -11.27                    | 0.15                                | -74.51                  | 0.31                           | 15.63 | 1.21         |
| 19-Jul-10                                    | -11.89                    | 0.14                                | -79.62                  | 0.45                           | 15.53 | 1.22         |

Cont. next page...

TABLE S6, cont.: Water isotope data of stream water collected from the Kosñipata River at San Pedro gauging station

| Date and hour<br>(dd-mmm-yy hr) | $\delta^{18}\text{O}$ (‰) | $\sigma \delta^{18}\text{O}$<br>(‰) | $\delta\text{D}$<br>(‰) | $\sigma \delta\text{D}$<br>(‰) | Dxs   | $\sigma \text{Dxs}$ |
|---------------------------------|---------------------------|-------------------------------------|-------------------------|--------------------------------|-------|---------------------|
| 11-Aug-10                       | -11.68                    | 0.14                                | -77.67                  | 0.37                           | 15.76 | 1.20                |
| 18-Aug-10                       | -11.64                    | 0.17                                | -79.54                  | 0.98                           | 13.55 | 1.67                |
| 23-Aug-10                       | -11.88                    | 0.14                                | -80.02                  | 1.31                           | 15.04 | 1.74                |
| 02-Sep-10                       | -10.37                    | 0.16                                | -64.99                  | 1.61                           | 18.01 | 2.04                |
| 04-Sep-10                       | -11.05                    | 0.15                                | -70.85                  | 1.49                           | 17.55 | 1.90                |
| 13-Sep-10                       | -11.36                    | 0.23                                | -76.20                  | 1.06                           | 14.70 | 2.15                |
| 15-Oct-10                       | -8.94                     | 0.09                                | -58.85                  | 0.17                           | 12.64 | 0.71                |
| 15-Nov-10                       | -10.72                    | 0.21                                | -71.86                  | 0.68                           | 13.90 | 1.83                |
| 19-Nov-10                       | -10.64                    | 0.24                                | -68.22                  | 0.57                           | 16.94 | 1.97                |
| 22-Nov-10                       | -10.63                    | 0.46                                | -64.93                  | 0.47                           | 20.09 | 3.74                |
| 06-Dec-10                       | -11.38                    | 0.15                                | -74.37                  | 0.46                           | 16.68 | 1.25                |
| 13-Dec-10                       | -12.26                    | 0.18                                | -76.37                  | 0.31                           | 21.68 | 1.45                |
| 20-Dec-10                       | -11.49                    | 0.18                                | -76.90                  | 0.60                           | 15.03 | 1.57                |
| 27-Dec-10                       | -12.54                    | 0.11                                | -86.25                  | 0.28                           | 14.05 | 0.90                |
| 03-Jan-11                       | -11.90                    | 0.14                                | -80.14                  | 0.36                           | 15.05 | 1.19                |
| 24-Jan-11                       | -11.63                    | 0.19                                | -79.70                  | 0.70                           | 13.38 | 1.69                |
| 08-Mar-11                       | -13.79                    | 0.15                                | -94.88                  | 0.23                           | 15.43 | 1.24                |
| 05-May-11                       | -13.04                    | 0.14                                | -88.81                  | 0.74                           | 15.49 | 1.37                |
| 18-Jul-11                       | -12.09                    | 0.18                                | -80.61                  | 0.75                           | 16.08 | 1.66                |

Mean isotope values and  $\sigma$  (standard deviation) were from 3 replicate sample injections (see description of methods in Supplementary Text)

# hour not reported when only one sample collected on a given date

439

440

TABLE S7: Results of Monte Carlo analysis of mixing fractions for water isotope samples from the Kosñipata River at the San Pedro gauging station

| Date and hour<br>(dd-mmm-yy hr) <sup>#</sup> | Wet Rain |      |      |      | Dry Rain |      |      |      | Cloud Water |       |      |      | # of real<br>simulations |
|----------------------------------------------|----------|------|------|------|----------|------|------|------|-------------|-------|------|------|--------------------------|
|                                              | Mean     | 5%   | 50%  | 95%  | Mean     | 5%   | 50%  | 95%  | Mean        | 5%    | 50%  | 95%  |                          |
| 01-Nov-09                                    | 0.56     | 0.39 | 0.54 | 0.77 | 0.29     | 0.04 | 0.30 | 0.54 | 0.15        | 0.020 | 0.14 | 0.33 | 6.27E+06                 |
| 07-Nov-09                                    | 0.49     | 0.34 | 0.48 | 0.66 | 0.20     | 0.02 | 0.19 | 0.41 | 0.31        | 0.151 | 0.30 | 0.52 | 4.70E+06                 |
| 15-Nov-09                                    | 0.67     | 0.50 | 0.66 | 0.86 | 0.24     | 0.03 | 0.24 | 0.45 | 0.10        | 0.008 | 0.09 | 0.24 | 4.05E+06                 |
| 30-Nov-09                                    | 0.60     | 0.42 | 0.59 | 0.83 | 0.28     | 0.03 | 0.28 | 0.52 | 0.12        | 0.011 | 0.10 | 0.28 | 4.98E+06                 |
| 30-Jan-10 00                                 | 0.62     | 0.45 | 0.61 | 0.83 | 0.27     | 0.03 | 0.27 | 0.50 | 0.12        | 0.011 | 0.10 | 0.27 | 5.00E+06                 |
| 04-Feb-10 03                                 | 0.66     | 0.52 | 0.65 | 0.83 | 0.21     | 0.02 | 0.21 | 0.40 | 0.13        | 0.017 | 0.12 | 0.29 | 4.34E+06                 |
| 04-Feb-10 09                                 | 0.65     | 0.46 | 0.64 | 0.87 | 0.25     | 0.03 | 0.25 | 0.49 | 0.09        | 0.007 | 0.08 | 0.24 | 3.48E+06                 |
| 04-Feb-10 15                                 | 0.65     | 0.48 | 0.64 | 0.86 | 0.25     | 0.03 | 0.25 | 0.47 | 0.10        | 0.008 | 0.09 | 0.24 | 4.12E+06                 |
| 04-Feb-10 21                                 | 0.64     | 0.48 | 0.63 | 0.85 | 0.25     | 0.03 | 0.25 | 0.46 | 0.11        | 0.010 | 0.10 | 0.26 | 4.57E+06                 |
| 05-Feb-10 09                                 | 0.64     | 0.47 | 0.63 | 0.84 | 0.25     | 0.03 | 0.25 | 0.47 | 0.12        | 0.011 | 0.10 | 0.27 | 4.74E+06                 |
| 05-Feb-10 15                                 | 0.64     | 0.48 | 0.63 | 0.84 | 0.24     | 0.03 | 0.24 | 0.45 | 0.12        | 0.012 | 0.10 | 0.27 | 4.65E+06                 |
| 05-Feb-10 21                                 | 0.64     | 0.48 | 0.63 | 0.84 | 0.24     | 0.03 | 0.25 | 0.46 | 0.12        | 0.011 | 0.10 | 0.27 | 4.64E+06                 |
| 06-Feb-10 09                                 | 0.64     | 0.47 | 0.63 | 0.84 | 0.25     | 0.03 | 0.25 | 0.47 | 0.11        | 0.011 | 0.10 | 0.26 | 4.60E+06                 |
| 06-Feb-10 15                                 | 0.63     | 0.48 | 0.62 | 0.83 | 0.24     | 0.03 | 0.24 | 0.46 | 0.12        | 0.014 | 0.11 | 0.28 | 4.87E+06                 |
| 07-Feb-10                                    | 0.65     | 0.48 | 0.63 | 0.85 | 0.24     | 0.03 | 0.24 | 0.46 | 0.11        | 0.011 | 0.10 | 0.26 | 4.54E+06                 |
| 07-Feb-10 03                                 | 0.65     | 0.48 | 0.63 | 0.85 | 0.24     | 0.03 | 0.24 | 0.46 | 0.11        | 0.011 | 0.10 | 0.26 | 4.52E+06                 |
| 07-Feb-10 09                                 | 0.62     | 0.47 | 0.61 | 0.81 | 0.24     | 0.03 | 0.25 | 0.46 | 0.14        | 0.017 | 0.12 | 0.30 | 5.13E+06                 |
| 07-Feb-10 15                                 | 0.64     | 0.48 | 0.63 | 0.84 | 0.24     | 0.03 | 0.25 | 0.46 | 0.12        | 0.012 | 0.11 | 0.28 | 4.76E+06                 |
| 07-Feb-10 21                                 | 0.65     | 0.48 | 0.64 | 0.85 | 0.24     | 0.03 | 0.24 | 0.46 | 0.11        | 0.010 | 0.10 | 0.26 | 4.40E+06                 |
| 08-Feb-10 03                                 | 0.62     | 0.47 | 0.61 | 0.82 | 0.24     | 0.03 | 0.24 | 0.46 | 0.14        | 0.017 | 0.13 | 0.30 | 5.09E+06                 |
| 08-Feb-10 09                                 | 0.66     | 0.49 | 0.65 | 0.86 | 0.24     | 0.03 | 0.24 | 0.45 | 0.11        | 0.010 | 0.09 | 0.25 | 4.27E+06                 |
| 08-Feb-10 15                                 | 0.61     | 0.46 | 0.60 | 0.80 | 0.24     | 0.03 | 0.24 | 0.45 | 0.15        | 0.023 | 0.14 | 0.32 | 5.25E+06                 |
| 08-Feb-10 21                                 | 0.60     | 0.46 | 0.59 | 0.79 | 0.24     | 0.03 | 0.24 | 0.46 | 0.16        | 0.025 | 0.15 | 0.33 | 5.29E+06                 |
| 09-Feb-10 03                                 | 0.66     | 0.49 | 0.64 | 0.86 | 0.24     | 0.03 | 0.24 | 0.46 | 0.10        | 0.009 | 0.09 | 0.25 | 4.21E+06                 |
| 09-Feb-10 09                                 | 0.61     | 0.46 | 0.60 | 0.80 | 0.24     | 0.03 | 0.24 | 0.46 | 0.15        | 0.023 | 0.14 | 0.32 | 5.28E+06                 |

|              |      |      |      |      |      |      |      |      |      |       |      |      |          |
|--------------|------|------|------|------|------|------|------|------|------|-------|------|------|----------|
| 09-Feb-10 15 | 0.62 | 0.47 | 0.61 | 0.82 | 0.24 | 0.03 | 0.24 | 0.46 | 0.13 | 0.017 | 0.12 | 0.30 | 5.06E+06 |
| 10-Feb-10 03 | 0.62 | 0.47 | 0.60 | 0.80 | 0.24 | 0.03 | 0.24 | 0.45 | 0.15 | 0.022 | 0.14 | 0.32 | 5.16E+06 |
| 11-Feb-10 09 | 0.63 | 0.47 | 0.61 | 0.82 | 0.24 | 0.03 | 0.24 | 0.45 | 0.13 | 0.017 | 0.12 | 0.30 | 5.01E+06 |
| 11-Feb-10 21 | 0.62 | 0.47 | 0.61 | 0.81 | 0.24 | 0.03 | 0.24 | 0.45 | 0.15 | 0.020 | 0.13 | 0.31 | 5.12E+06 |
| 12-Feb-10 05 | 0.60 | 0.43 | 0.58 | 0.81 | 0.27 | 0.03 | 0.28 | 0.51 | 0.13 | 0.014 | 0.11 | 0.29 | 5.53E+06 |
| 12-Feb-10 09 | 0.62 | 0.47 | 0.61 | 0.81 | 0.24 | 0.03 | 0.24 | 0.45 | 0.14 | 0.019 | 0.13 | 0.31 | 5.11E+06 |
| 12-Feb-10 14 | 0.62 | 0.45 | 0.60 | 0.82 | 0.26 | 0.03 | 0.26 | 0.48 | 0.13 | 0.013 | 0.11 | 0.29 | 5.12E+06 |
| 22-Feb-10    | 0.64 | 0.46 | 0.64 | 0.86 | 0.26 | 0.03 | 0.26 | 0.48 | 0.10 | 0.008 | 0.09 | 0.25 | 4.19E+06 |
| 22-Mar-10    | 0.63 | 0.46 | 0.61 | 0.83 | 0.26 | 0.03 | 0.26 | 0.48 | 0.12 | 0.012 | 0.10 | 0.27 | 4.92E+06 |
| 29-Mar-10    | 0.64 | 0.48 | 0.63 | 0.84 | 0.24 | 0.03 | 0.24 | 0.46 | 0.12 | 0.012 | 0.11 | 0.28 | 4.64E+06 |
| 05-Apr-10    | 0.67 | 0.54 | 0.66 | 0.85 | 0.19 | 0.02 | 0.19 | 0.38 | 0.13 | 0.016 | 0.12 | 0.29 | 4.01E+06 |
| 25-Apr-10    | 0.64 | 0.48 | 0.63 | 0.84 | 0.24 | 0.03 | 0.24 | 0.46 | 0.12 | 0.012 | 0.10 | 0.27 | 4.55E+06 |
| 16-May-10    | 0.65 | 0.49 | 0.64 | 0.85 | 0.24 | 0.03 | 0.24 | 0.45 | 0.11 | 0.010 | 0.10 | 0.26 | 4.45E+06 |
| 26-May-10    | 0.60 | 0.44 | 0.59 | 0.80 | 0.26 | 0.03 | 0.27 | 0.49 | 0.14 | 0.017 | 0.12 | 0.31 | 5.47E+06 |
| 31-May-10    | 0.62 | 0.46 | 0.61 | 0.81 | 0.25 | 0.03 | 0.25 | 0.46 | 0.14 | 0.016 | 0.12 | 0.30 | 5.15E+06 |
| 14-Jun-10    | 0.65 | 0.50 | 0.63 | 0.83 | 0.22 | 0.03 | 0.22 | 0.43 | 0.13 | 0.015 | 0.12 | 0.29 | 4.54E+06 |
| 12-Jul-10    | 0.62 | 0.46 | 0.61 | 0.82 | 0.25 | 0.03 | 0.25 | 0.47 | 0.13 | 0.015 | 0.12 | 0.30 | 5.18E+06 |
| 19-Jul-10    | 0.61 | 0.44 | 0.60 | 0.82 | 0.26 | 0.03 | 0.26 | 0.48 | 0.13 | 0.014 | 0.12 | 0.31 | 5.08E+06 |
| 11-Aug-10    | 0.56 | 0.39 | 0.55 | 0.78 | 0.29 | 0.04 | 0.30 | 0.53 | 0.15 | 0.019 | 0.13 | 0.33 | 6.23E+06 |
| 18-Aug-10    | 0.60 | 0.44 | 0.59 | 0.80 | 0.26 | 0.03 | 0.26 | 0.48 | 0.14 | 0.018 | 0.13 | 0.31 | 5.47E+06 |
| 23-Aug-10    | 0.58 | 0.40 | 0.57 | 0.81 | 0.29 | 0.04 | 0.30 | 0.54 | 0.12 | 0.013 | 0.11 | 0.29 | 5.71E+06 |
| 02-Sep-10    | 0.61 | 0.44 | 0.59 | 0.82 | 0.27 | 0.03 | 0.27 | 0.50 | 0.13 | 0.013 | 0.11 | 0.29 | 5.33E+06 |
| 04-Sep-10    | 0.60 | 0.43 | 0.59 | 0.80 | 0.26 | 0.03 | 0.26 | 0.49 | 0.14 | 0.017 | 0.13 | 0.32 | 5.30E+06 |
| 13-Sep-10    | 0.59 | 0.42 | 0.58 | 0.81 | 0.28 | 0.03 | 0.28 | 0.51 | 0.13 | 0.014 | 0.11 | 0.30 | 5.60E+06 |
| 15-Oct-10    | 0.62 | 0.44 | 0.60 | 0.83 | 0.26 | 0.03 | 0.27 | 0.49 | 0.12 | 0.012 | 0.11 | 0.29 | 4.78E+06 |
| 15-Nov-10    | 0.65 | 0.46 | 0.64 | 0.86 | 0.26 | 0.03 | 0.26 | 0.49 | 0.10 | 0.007 | 0.08 | 0.24 | 3.63E+06 |
| 19-Nov-10    | 0.49 | 0.30 | 0.47 | 0.72 | 0.33 | 0.05 | 0.34 | 0.60 | 0.18 | 0.026 | 0.17 | 0.40 | 7.14E+06 |
| 22-Nov-10    | 0.53 | 0.35 | 0.51 | 0.75 | 0.30 | 0.04 | 0.30 | 0.55 | 0.18 | 0.025 | 0.16 | 0.38 | 6.52E+06 |
| 06-Dec-10    | 0.60 | 0.41 | 0.59 | 0.83 | 0.28 | 0.03 | 0.28 | 0.52 | 0.12 | 0.010 | 0.10 | 0.30 | 4.55E+06 |
| 13-Dec-10    | 0.64 | 0.42 | 0.65 | 0.83 | 0.29 | 0.06 | 0.28 | 0.56 | 0.07 | 0.004 | 0.06 | 0.19 | 1.88E+06 |



|           |      |      |      |      |      |      |      |      |      |       |      |      |          |
|-----------|------|------|------|------|------|------|------|------|------|-------|------|------|----------|
| 20-Dec-10 | 0.59 | 0.42 | 0.58 | 0.81 | 0.28 | 0.03 | 0.28 | 0.52 | 0.13 | 0.013 | 0.11 | 0.30 | 5.50E+06 |
| 27-Dec-10 | 0.50 | 0.33 | 0.48 | 0.72 | 0.32 | 0.04 | 0.33 | 0.58 | 0.18 | 0.033 | 0.17 | 0.38 | 7.23E+06 |
| 03-Jan-11 | 0.56 | 0.39 | 0.54 | 0.77 | 0.29 | 0.04 | 0.29 | 0.53 | 0.16 | 0.023 | 0.14 | 0.34 | 6.31E+06 |
| 24-Jan-11 | 0.59 | 0.43 | 0.58 | 0.79 | 0.26 | 0.03 | 0.27 | 0.49 | 0.14 | 0.020 | 0.13 | 0.32 | 5.63E+06 |
| 08-Mar-11 | 0.52 | 0.34 | 0.51 | 0.76 | 0.32 | 0.04 | 0.33 | 0.58 | 0.16 | 0.019 | 0.14 | 0.36 | 6.49E+06 |
| 05-May-11 | 0.46 | 0.27 | 0.44 | 0.70 | 0.29 | 0.03 | 0.29 | 0.57 | 0.25 | 0.037 | 0.23 | 0.52 | 6.43E+06 |
| 18-Jul-11 | 0.61 | 0.40 | 0.60 | 0.84 | 0.29 | 0.04 | 0.29 | 0.54 | 0.10 | 0.008 | 0.08 | 0.26 | 3.97E+06 |

---

# hour not reported when only one sample collected on a given date

---

442

TABLE S8: TRMM-meteorological station rainfall regressions used to estimate rainfall

| Station number<br>(Figure 1a) | Meteorological<br>station name | Rainfall estimate (mm month <sup>-1</sup> )* | $r^2$ |
|-------------------------------|--------------------------------|----------------------------------------------|-------|
| 1                             | Acjanaco                       | $0.8395 \times \text{TRMM} + 35.315$         | 0.73  |
| 2                             | 3450 TU                        | $1.1091 \times \text{TRMM} + 58.255$         | 0.89  |
| 3                             | Wayqecha                       | $0.6606 \times \text{TRMM} + 43.022$         | 0.67  |
| 4                             | 2750 TU                        | $1.239 \times \text{TRMM} + 93.704$          | 0.84  |
| 5                             | Rocotal                        | $1.264 \times \text{TRMM} + 173.4$           | 0.31  |
| 6                             | 1800 TU                        | $1.1793 \times \text{TRMM} + 172.08$         | 0.79  |
| 7                             | San Pedro                      | $1.354 \times \text{TRMM} + 217.35$          | 0.73  |
| 8                             | 1500 SP                        | $1.6807 \times \text{TRMM} + 203.07$         | 0.83  |
| 9                             | Chontachaca                    | $1.183 \times \text{TRMM} + 276.69$          | 0.63  |

\* Wind-induced rainfall loss is not included in these equations, which would add approximately 2.5% to these rainfall measures.

443

444

TABLE S9: Water isotope data of stream water collected from the Kosñipata River at the Wayqecha gauging station

| Date and hour<br>(dd-mmm-yy hr) <sup>#</sup> | $\delta^{18}\text{O}$ (‰) | $\sigma \delta^{18}\text{O}$<br>(‰) | $\delta\text{D}$<br>(‰) | $\sigma \delta\text{D}$<br>(‰) | Dxs   | $\sigma \text{Dxs}$ |
|----------------------------------------------|---------------------------|-------------------------------------|-------------------------|--------------------------------|-------|---------------------|
| 29-Jan-10 09                                 | -13.93                    | 0.16                                | -98.40                  | 0.74                           | 13.03 | 1.46                |
| 29-Jan-10 15                                 | -14.02                    | 0.16                                | -98.93                  | 0.22                           | 13.24 | 1.28                |
| 30-Jan-10 03                                 | -14.33                    | 0.16                                | -101.49                 | 0.29                           | 13.13 | 1.30                |
| 30-Jan-10 09                                 | -14.17                    | 0.16                                | -100.22                 | 0.54                           | 13.11 | 1.37                |
| 30-Jan-10 15                                 | -14.21                    | 0.16                                | -99.83                  | 0.27                           | 13.81 | 1.29                |
| 31-Jan-10 03                                 | -14.08                    | 0.16                                | -99.04                  | 0.72                           | 13.61 | 1.45                |
| 31-Jan-10 15                                 | -13.85                    | 0.16                                | -98.16                  | 0.66                           | 12.62 | 1.42                |
| 01-Feb-10 15                                 | -13.83                    | 0.16                                | -97.25                  | 0.86                           | 13.38 | 1.52                |
| 01-Feb-10 21                                 | -13.84                    | 0.16                                | -96.81                  | 0.47                           | 13.88 | 1.34                |
| 02-Feb-10 03                                 | -13.85                    | 0.16                                | -97.03                  | 0.84                           | 13.81 | 1.51                |
| 02-Feb-10 15                                 | -13.67                    | 0.16                                | -96.45                  | 0.77                           | 12.92 | 1.47                |
| 03-Feb-10 03                                 | -13.77                    | 0.16                                | -97.41                  | 0.53                           | 12.76 | 1.36                |
| 03-Feb-10 09                                 | -13.74                    | 0.16                                | -96.05                  | 1.16                           | 13.85 | 1.70                |
| 03-Feb-10 15                                 | -13.73                    | 0.16                                | -96.48                  | 0.38                           | 13.37 | 1.31                |
| 04-Feb-10 03                                 | -13.75                    | 0.16                                | -96.33                  | 0.29                           | 13.71 | 1.28                |
| 04-Feb-10 09                                 | -13.80                    | 0.16                                | -96.08                  | 0.93                           | 14.29 | 1.56                |
| 04-Feb-10 15                                 | -13.65                    | 0.16                                | -95.33                  | 0.27                           | 13.83 | 1.28                |
| 04-Feb-10 21                                 | -13.75                    | 0.16                                | -96.22                  | 0.33                           | 13.79 | 1.29                |
| 05-Feb-10 09                                 | -13.80                    | 0.16                                | -96.72                  | 0.84                           | 13.66 | 1.51                |
| 05-Feb-10 15                                 | -13.87                    | 0.16                                | -97.55                  | 0.58                           | 13.43 | 1.38                |
| 05-Feb-10 21                                 | -13.76                    | 0.16                                | -96.59                  | 0.32                           | 13.51 | 1.29                |
| 06-Feb-10 03                                 | -13.81                    | 0.16                                | -96.85                  | 1.15                           | 13.61 | 1.70                |
| 06-Feb-10 09                                 | -13.63                    | 0.16                                | -96.75                  | 0.16                           | 12.33 | 1.26                |
| 06-Feb-10 15                                 | -13.68                    | 0.16                                | -96.55                  | 0.21                           | 12.92 | 1.27                |
| 06-Feb-10 21                                 | -13.80                    | 0.16                                | -96.14                  | 0.23                           | 14.27 | 1.27                |
| 07-Feb-10 03                                 | -13.70                    | 0.16                                | -96.27                  | 0.76                           | 13.37 | 1.46                |
| 07-Feb-10 09                                 | -13.73                    | 0.16                                | -96.22                  | 0.24                           | 13.59 | 1.27                |
| 07-Feb-10 15                                 | -13.70                    | 0.16                                | -96.26                  | 0.05                           | 13.36 | 1.25                |
| 07-Feb-10 21                                 | -13.74                    | 0.16                                | -96.25                  | 0.73                           | 13.63 | 1.45                |
| 08-Feb-10 03                                 | -13.65                    | 0.16                                | -95.85                  | 0.42                           | 13.37 | 1.32                |
| 08-Feb-10 09                                 | -13.73                    | 0.16                                | -96.81                  | 0.74                           | 12.99 | 1.45                |
| 08-Feb-10 21                                 | -13.68                    | 0.16                                | -96.28                  | 0.18                           | 13.19 | 1.26                |
| 09-Feb-10 03                                 | -13.65                    | 0.16                                | -95.84                  | 0.16                           | 13.33 | 1.26                |
| 09-Feb-10 09                                 | -13.87                    | 0.16                                | -97.70                  | 0.39                           | 13.26 | 1.31                |
| 09-Feb-10 15                                 | -13.71                    | 0.16                                | -96.45                  | 0.46                           | 13.20 | 1.33                |
| 09-Feb-10 21                                 | -13.75                    | 0.16                                | -96.34                  | 0.19                           | 13.62 | 1.26                |
| 10-Feb-10 03                                 | -13.77                    | 0.16                                | -96.28                  | 1.26                           | 13.86 | 1.78                |
| 10-Feb-10 09                                 | -13.68                    | 0.16                                | -96.19                  | 0.16                           | 13.24 | 1.26                |
| 10-Feb-10 15                                 | -13.70                    | 0.16                                | -96.43                  | 0.55                           | 13.15 | 1.36                |
| 10-Feb-10 21                                 | -13.47                    | 0.16                                | -94.13                  | 0.26                           | 13.66 | 1.27                |
| 11-Feb-10 15                                 | -13.66                    | 0.16                                | -95.57                  | 0.39                           | 13.69 | 1.31                |
| 11-Feb-10 21                                 | -13.50                    | 0.16                                | -94.56                  | 0.53                           | 13.45 | 1.35                |
| 22-Feb-10                                    | -13.81                    | 0.16                                | -98.09                  | 0.05                           | 12.38 | 1.25                |

Cont. next page...

TABLE S9, cont.: Water isotope data of stream water collected from the Kosñipata River at the Wayqecha gauging station

| Date and hour<br>(dd-mmm-yy hr) | $\delta^{18}\text{O}$ (‰) | $\sigma \delta^{18}\text{O}$<br>(‰) | $\delta\text{D}$<br>(‰) | $\sigma \delta\text{D}$<br>(‰) | Dxs   | $\sigma$ Dxs |
|---------------------------------|---------------------------|-------------------------------------|-------------------------|--------------------------------|-------|--------------|
| 01-Mar-10                       | -13.83                    | 0.16                                | -97.81                  | 0.57                           | 12.86 | 1.37         |
| 05-Apr-10                       | -13.58                    | 0.16                                | -95.45                  | 0.27                           | 13.22 | 1.27         |
| 12-Apr-10                       | -13.57                    | 0.16                                | -95.24                  | 0.24                           | 13.31 | 1.27         |
| 19-Apr-10                       | -13.23                    | 0.15                                | -93.21                  | 0.37                           | 12.62 | 1.29         |
| 10-May-10                       | -13.45                    | 0.16                                | -94.45                  | 0.13                           | 13.16 | 1.25         |
| 16-May-10                       | -13.33                    | 0.15                                | -93.77                  | 0.25                           | 12.85 | 1.27         |
| 07-Jun-10                       | -13.31                    | 0.15                                | -93.80                  | 0.33                           | 12.71 | 1.28         |
| 28-Jun-10                       | -12.83                    | 0.15                                | -88.97                  | 0.37                           | 13.66 | 1.29         |
| 11-Jul-10                       | -13.05                    | 0.15                                | -90.93                  | 0.17                           | 13.44 | 1.25         |
| 26-Jul-10                       | -13.07                    | 0.15                                | -91.66                  | 0.50                           | 12.89 | 1.33         |
| 22-Aug-10                       | -13.05                    | 0.15                                | -91.25                  | 0.30                           | 13.14 | 1.27         |
| 29-Aug-10                       | -13.10                    | 0.15                                | -90.49                  | 0.31                           | 14.29 | 1.27         |
| 25-Oct-10                       | -12.89                    | 0.15                                | -89.90                  | 0.34                           | 13.21 | 1.28         |
| 20-Dec-10                       | -13.20                    | 0.15                                | -91.93                  | 0.25                           | 13.64 | 1.26         |
| 03-Jul-11                       | -13.37                    | 0.16                                | -94.66                  | 0.67                           | 12.29 | 1.41         |
| 18-Feb-11                       | -13.81                    | 0.16                                | -96.92                  | 0.28                           | 13.58 | 1.28         |
| 21-Mar-11                       | -14.01                    | 0.16                                | -99.00                  | 0.51                           | 13.09 | 1.36         |

Mean isotope values and  $\sigma$  (standard deviation) were from 3 replicate sample injections (see description of methods in Supplementary Text)

# hour not reported when only one sample collected on a given date

445

446

447

TABLE S10: Results for the Kosñipata catchment at the Wayqecha (WQ) gauging station.

|         | Q (m <sup>3</sup> s <sup>-1</sup> ) | Runoff, mm d <sup>-1</sup> (%) | Catchment wide<br>Rainfall <sup>^</sup> mm d <sup>-1</sup> (%) | Catchment wide<br>AET mm d <sup>-1</sup> (%) |
|---------|-------------------------------------|--------------------------------|----------------------------------------------------------------|----------------------------------------------|
| Wet     | 8.0                                 | 14.1 (56.5)                    | 12.9 (62)                                                      | 1.6 (31)                                     |
| Wet-dry | 7.8                                 | 14.4 (13.5)                    | 5.4 (6.5)                                                      | 1.7 (7.8)                                    |
| Dry     | 2.3                                 | 4.1 (21)                       | 3.1 (18)                                                       | 1.6 (38)                                     |
| Dry-wet | 2.6                                 | 4.6 (9)                        | 5.6 (13.5)                                                     | 1.9 (18)                                     |
| Annual  | 4.7                                 | 8.4 (100)                      | 6.9 (100)                                                      | 1.8 (100)                                    |

Seasonal contribution as percentage of total annual in parenthesis.

<sup>^</sup> Catchment-wide rainfall is reported for February 2010 to January 2011 and includes wind-induced rainfall loss (Table S3) and with the contribution from each season as a percentage in parenthesis.

448

449

450 **Supplementary figures**

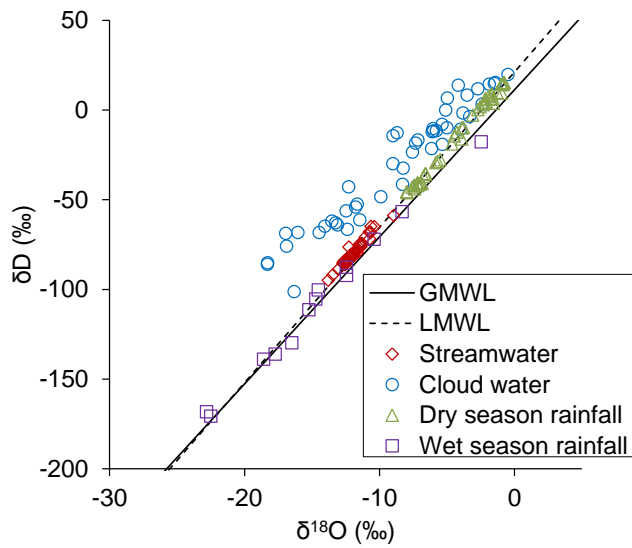

451

452 Figure S1: Hydrogen isotope ratio ( $\delta D$ , ‰) plotted versus oxygen isotope ratio ( $\delta^{18}O$ , ‰) of  
453 rainwater, dry season cloud water vapour (blue circles), and river water (red diamonds) from  
454 the Kosñipata catchment. Rainwater samples are from the dry season (May to August, green  
455 triangles) and the wet season (December to March, purple squares). The global meteoric  
456 water line (GMWL,  $\delta D = 8.20 \times \delta^{18}O + 11.27$ ) is shown as the solid line (Rozanski et al.,  
457 1993; Craig, 1961). The local meteoric water line (LMWL,  $\delta D = 8.6561 \times \delta^{18}O + 21.119$ ) is  
458 shown as the dashed line.

459

460
